# Supplementary material for: Post-polymerisation diversification of conjugated polymers by an inverse electron demand Diels–Alder reaction
Source: Royal Society of Chemistry journal article supplement (doi:10.1039/d3py00585b), 2023-01-01

## Supporting Information for

# Post-Polymerisation Diversification of Conjugated Polymer by Inverse Electron Demand Diels-Alder Reaction

Zhuang Mao Png, Xiang Yun Debbie Soo, Jun Xiang Damian Liew, Ming Hui Chua, Shanxin Xiong, Qiang Zhu, Jianwei Xu\*

## Materials and Methods

### General Experimental Procedure

Commercial reagents were used as supplied from Sigma Aldrich, Alfa Aesar, or Combi blocks without further purification. Tetrazine **1** was prepared by modification of previously reported procedures.<sup>1</sup>

Nuclear magnetic resonance (NMR) spectra were recorded on a Jeol 500 MHz using CDCl<sub>3</sub> as the solvent. Data are reported as follows: chemical shift (integration, splitting (s = singlet, d = doublet, t = triplet, q = quartet, qt = quintet, sxt = sextet, spt = septet, m = multiplet), coupling constant, assignment).

Infrared spectra (FT-IR) were recorded using a Perkin-Elmer Paragon 1000 Fourier transform Spectrometer and with samples pelletized with KBr, and absorption maxima ( $\lambda_{\text{max}}$ ) being quoted in wavenumbers (cm<sup>-1</sup>). UV spectra were recorded on a Shimadzu UV3101PC UV-vis-NIR spectrophotometer with chloroform as the solvent and at a monomer concentration of about 2.5 x 10<sup>-5</sup> M. High Resolution Mass Spectrometry (HRMS) was carried out by the National University of Singapore Mass Spectrometry Service using a Bruker MicrOTOF-QII positive ion nano-electrospray.

Proportion of protonated polymer was estimated using the following equation:

$$\frac{[HP^+]}{[P]} \approx \frac{\epsilon_f - \epsilon_x}{\epsilon_f}$$

Whereby  $\epsilon_f = \epsilon$  of polymer at local maxima between 538 nm to 574 nm when amount of TFA added is 20  $\mu\text{L}$ , and  $\epsilon_x = \epsilon$  of polymer at local maxima between 538 to 574 nm when the amount of TFA added is x  $\mu\text{L}$ .

Emission ratio was calculated by the following equation:

$$\text{Emission ratio} = \frac{\text{Emission}_x}{\text{Initial emission}}$$

Whereby "initial emission" refers to the average measured emission (between 460 to 700 nm) of the polymer when no metal ions is added, and emission<sub>x</sub> refers to the measured emission of the polymer (between 460 to 700 nm) when x amount of metal ions is added.

General method A for small molecule iEDDA reaction

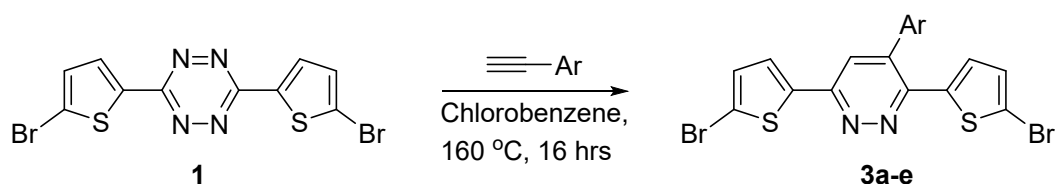

To a red solution of tetrazine **1** (404 mg, 1 mmol, 1 eq) in chlorobenzene (5 mL) was added the corresponding aryl alkyne (5 eq). The solution was stirred at 160 °C for 16 hours, with the solution turning from red to yellowish brown, then cooled to RT, and concentrated *in vacuo* to remove excess chlorobenzene. The solid was then re-dissolved in minimum chloroform and reprecipitated in methanol, and filtered to obtain a yellowish-brown powder, which was dried and used without further purification.

3,6-bis(5-bromothiophen-2-yl)-4-phenylpyridazine (3a)

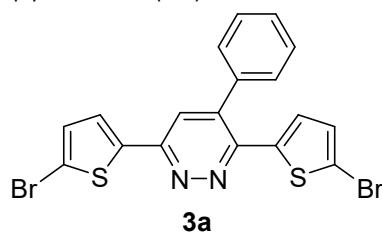

General procedure A was applied to tetrazine **1** with phenylacetylene (548  $\mu\text{L}$ , 5 mmol). A yellowish-brown powder was obtained (444 mg, 92%). IR ( $\lambda_{\text{max}}/\text{cm}^{-1}$ ) 3058, 1578, 1492, 1484, 1380, 1237, 1077.  $^1\text{H}$  NMR (500.1 MHz,  $\text{CDCl}_3$ ) 7.51–7.49 (4H, m), 7.37 – 7.35 (3H, m), 7.10 (1H, d,  $J = 4.2$  Hz), 6.78 (1H, d,  $J = 3.8$  Hz), 6.35 (1H, d,  $J = 4.2$  Hz).  $^{13}\text{C}$  NMR (100.6 MHz,  $\text{CDCl}_3$ ) 152.0, 151.6, 141.4, 141.3, 138.4, 136.3, 131.3, 130.6, 130.0, 129.7, 129.4, 128.4, 128.4, 126.8, 123.3, 117.7, 117.6. HRMS (FTMS +p NSI)  $m/z$ :  $[\text{M} + \text{H}]^+$  calculated for  $\text{C}_{18}\text{H}_{11}\text{Br}_2\text{N}_2\text{S}_2$  476.8725, found = 476.8723,  $\Delta = 0.42$  ppm.

3,6-bis(5-bromothiophen-2-yl)-4-(*p*-tolyl)pyridazine (3b)

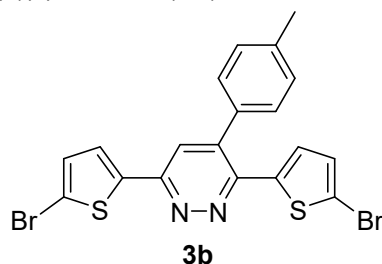

General procedure A was applied to tetrazine **1** with *p*-tolylacetylene (633  $\mu\text{L}$ , 5 mmol). A yellowish-brown powder was obtained (442 mg, 90%). IR ( $\lambda_{\text{max}}/\text{cm}^{-1}$ ) 3031, 2917, 1610, 1578, 1509, 1484, 1374, 1236, 1212, 1178, 1073.  $^1\text{H}$  NMR (500.1 MHz,  $\text{CDCl}_3$ ) 7.61 (1H, d,  $J = 3.6$  Hz), 7.54 (1H, s), 7.32 – 7.25 (4H, m), 7.13 (1H, d,  $J = 3.6$  Hz), 6.84 (1H, d,  $J = 3.8$  Hz), 6.65 (1H, d,  $J = 3.7$  Hz), 2.46 (3H, s),  $^{13}\text{C}$  NMR (100.6 MHz,  $\text{CDCl}_3$ ) 151.7, 151.6, 140.6, 140.3, 140.2, 139.5, 132.9, 131.5, 130.7, 130.5, 130.1, 128.4, 128.3, 127.7, 124.3, 118.2, 118.0, 21.6. HRMS (FTMS +p NSI)  $m/z$ :  $[\text{M} + \text{H}]^+$  calculated for  $\text{C}_{19}\text{H}_{13}\text{Br}_2\text{N}_2\text{S}_2$  490.8880 found = 490.8881,  $\Delta = 0.20$  ppm.

3,6-bis(5-bromothiophen-2-yl)-4-(4-methoxyphenyl)pyridazine (3c)

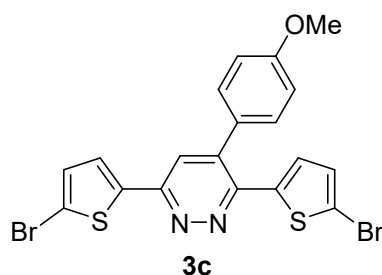

General procedure A was applied to tetrazine **1** with 4-ethynylanisole (647  $\mu\text{L}$ , 5 mmol). A yellowish-brown powder was obtained (447 mg, 88%). IR ( $\lambda_{\text{max}}/\text{cm}^{-1}$ ) 2963, 1607, 1581, 1537, 1569, 1425, 1385, 1247, 1174, 1020.  $^1\text{H}$  NMR (500.1 MHz,  $\text{CDCl}_3$ ) 7.48 (1H, s), 7.38 (1H, d,  $J = 3.6$  Hz), 7.29 (2H, d,  $J = 8.2$  Hz), 7.10 (1H, d,  $J = 3.6$  Hz), 7.01 (2H, d,  $J = 8.2$  Hz), 6.81 (1H, d,  $J = 4.2$  Hz), 6.51 (1H, d,  $J = 4.2$  Hz).  $^{13}\text{C}$  NMR (100.6 MHz,  $\text{CDCl}_3$ ) 160.8, 152.0, 151.9, 141.3, 141.1, 138.5, 131.3, 130.7, 130.0, 129.9, 128.1, 127.0, 123.6, 117.8, 117.5, 114.8, 55.6. HRMS (FTMS +p NSI)  $m/z$ :  $[\text{M} + \text{H}]^+$  calculated for  $\text{C}_{19}\text{H}_{13}\text{Br}_2\text{N}_2\text{OS}_2$  506.8831 found = 506.8829,  $\Delta = 0.39$  ppm.

3,6-bis(5-bromothiophen-2-yl)-4-(4-fluorophenyl)pyridazine (3d)

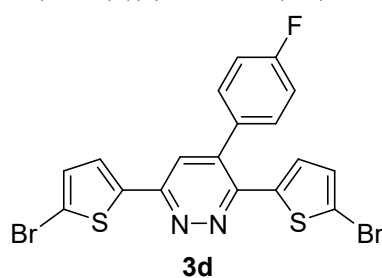

General procedure A was applied to tetrazine **1** with 1-ethynyl-4-fluorobenzene (572  $\mu\text{L}$ , 5 mmol). A brown powder was obtained (430 mg, 87%). IR ( $\lambda_{\text{max}}/\text{cm}^{-1}$ ) 3047, 1606, 1509, 1435, 1380, 1236, 1162, 1078.  $^1\text{H}$  NMR (500.1 MHz,  $\text{CDCl}_3$ ) 7.47 (1H, s), 7.37 – 7.34 (3H, m), 7.20 (2H, t,  $J = 8.3$  Hz) 7.10 (1H, d,  $J = 4.7$  Hz), 6.82 (1H, d,  $J = 4.1$  Hz), 6.41 (1H, d,  $J = 4.1$  Hz).  $^{19}\text{F}$  NMR (470.6 MHz,  $\text{CDCl}_3$ ) -110.6  $^{13}\text{C}$  NMR (100.6 MHz,  $\text{CDCl}_3$ ) 163.5 (d,  $J = 247.9$  Hz), 152.1, 151.7, 141.2, 137.3, 132.2, 131.3, 130.7, 130.5, 130.4, 129.9, 126.8, 123.3, 117.7, 116.8, 116.6. HRMS (FTMS +p NSI)  $m/z$ :  $[\text{M} + \text{H}]^+$  calculated for  $\text{C}_{18}\text{H}_{10}\text{Br}_2\text{FN}_2\text{S}_2$  494.8631 found = 494.8637,  $\Delta = 1.21$  ppm.

3,6-bis(5-bromothiophen-2-yl)-4-(4-(trifluoromethyl)phenyl)pyridazine (**3e**)

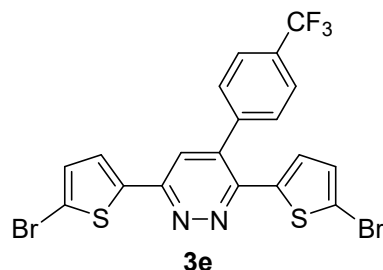

General procedure A was applied to tetrazine **1** with 4-ethynyl- $\alpha,\alpha,\alpha$ -trifluorotoluene (817  $\mu\text{L}$ , 5 mmol). A brown powder was obtained (435 mg, 80%). IR ( $\lambda_{\text{max}}/\text{cm}^{-1}$ ) 3047, 1617, 1581, 1439, 1386, 1165, 1125, 1068.  $^1\text{H}$  NMR (500.1 MHz,  $\text{CDCl}_3$ ) 7.77 (2H, d,  $J = 7.8$  Hz) 7.52 (2H, d,  $J = 7.8$  Hz), 7.47 (1H, s), 7.37 (1H, d,  $J = 3.9$  Hz), 7.11 (1H, d,  $J = 3.9$  Hz), 6.82 (1H, d,  $J = 4.1$  Hz), 6.32 (1H, d,  $J = 4.1$  Hz).  $^{19}\text{F}$  NMR (470.6 MHz,  $\text{CDCl}_3$ ) -62.6  $^{13}\text{C}$  NMR (100.6 MHz,  $\text{CDCl}_3$ ) 152.1, 151.1, 141.0, 140.9, 140.8, 140.0, 136.8, 132.1, 131.3, 130.8, 129.9, 129.0, 127.0, 126.5, 124.9, 123.1, 118.1, 118.0. HRMS (FTMS +p NSI)  $m/z$ :  $[\text{M} + \text{H}]^+$  calculated for  $\text{C}_{19}\text{H}_{10}\text{Br}_2\text{F}_3\text{N}_2\text{S}_2$  544.8599 found = 544.8596,  $\Delta = 0.55$  ppm.

Stille Coupling of P1

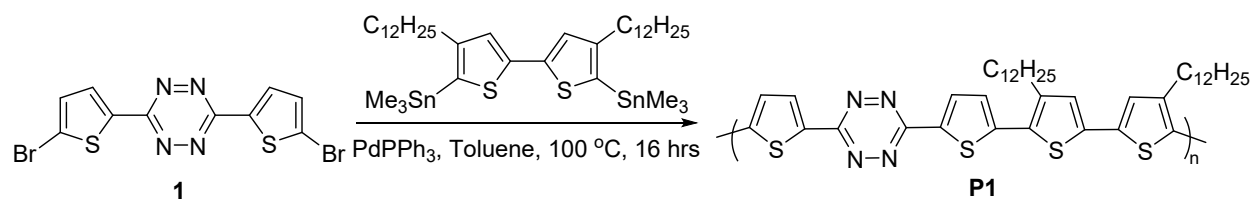

To a 100 mL round-bottomed flask with a large oval stirrer bar was added tetrazine **1** (404 mg, 1 mmol), (4,4'-didodecyl-[2,2'-bithiophene]-5,5'-diyl)bis(trimethylstannane) (828 mg, 1 mmol), and tetrakis(triphenylphosphine)palladium(0) (57.8 mg, 0.05 mmol). The flask was sealed with a septum and evacuated / backfilled with nitrogen three times. Degassed toluene (10 mL) was then added *via* syringe. The mixture was heated at 120  $^{\circ}\text{C}$  for 24 hours. The solution was allowed to cool, then precipitated in methanol (100 mL). Filtration gave the crude polymer as a purple powder. The polymer was purified by Soxhlet extraction by acetone (3 hours), hexane (3 hours), and finally chloroform (3 hours). Chloroform was then removed in *vacuo* and the polymer was re-dissolved in a minimum amount of chloroform. The polymer was then re-precipitated in methanol, filtered, and dried under vacuum to yield a purple solid (475 mg, 63%,  $M_n = 5.0$  kDa, PDI = 1.42). IR ( $\lambda_{\text{max}}/\text{cm}^{-1}$ ) 2922, 2851, 2344, 1444, 1388, 1080, 1063, 1001.  $^1\text{H}$  NMR (500.1 MHz,  $\text{CDCl}_3$ ) 8.20 (br), 7.03 (br), 2.82 (br), 2.80 (br), 1.80 – 0.85 (m, alkyl peaks). Note: Increasing the reaction time to 72 hours lead to lower yields (~ 10%) due to greater amount of insoluble residue after Soxhlet extraction with chloroform.  $M_n$  of chloroform portion remains similar at about ~ 5 kDa.

Stille Coupling of P2a (ii)

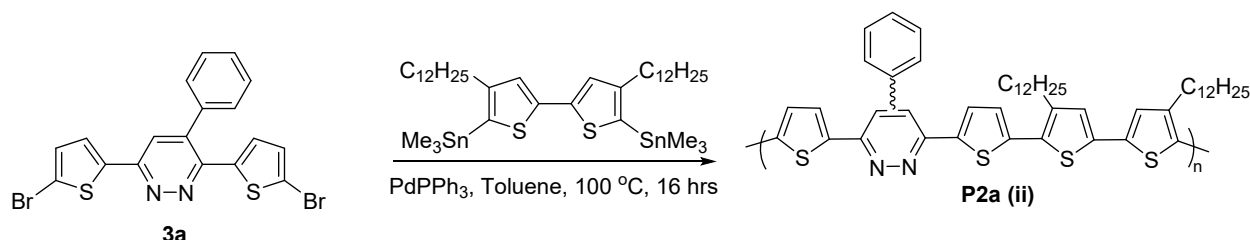

To a 100 mL round-bottomed flask with a large oval stirrer bar was added 3,6-bis(5-bromothiophen-2-yl)-4-phenylpyridazine **3a** (93 mg, 0.2 mmol), (4,4'-didodecyl-[2,2'-bithiophene]-5,5'-diyl)bis(trimethylstannane) (165 mg, 0.2 mmol), and tetrakis(triphenylphosphine)palladium(0) (11.5 mg, 0.01 mmol). The flask was sealed with a septum and evacuated / backfilled with nitrogen three times. Degassed toluene (2 mL) was then added *via* syringe. The mixture was heated at 120  $^{\circ}\text{C}$  for 24 hours. The solution was allowed to cool, then precipitated in methanol (100 mL). Filtration gave the crude polymer as an orange-red powder. The polymer was purified by Soxhlet extraction by acetone (3 hours), hexane (3 hours), and finally chloroform (3 hours). Chloroform was then removed in *vacuo* and the polymer was re-

dissolved in a minimum amount of chloroform. The polymer was then re-precipitated in methanol, filtered, and dried under vacuum to yield a yellow solid (110 mg, 67 %,  $M_n = 8.9$  kDa, PDI = 1.69). IR ( $\lambda_{max}/cm^{-1}$ ) 2921, 2850, 1442, 1380, 1078, 792.  $^1H$  NMR (500.1 MHz,  $CDCl_3$ ) 7.60 – 7.48 (br), 7.47 – 7.38 (br), 7.20 – 7.14 (br), 7.05 – 6.96 (br), 6.90 – 6.84 (br), 6.60 – 6.58 (br), 2.87 – 2.71 (br), 1.75 – 1.08 (m, alkyl peaks), 0.93 – 0.78 (br).

General method B for polymer iEDDA reaction

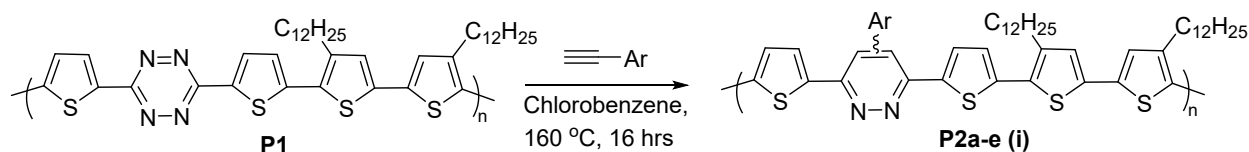

To a dark purple solution of polymer **P1** (37.8 mg, 0.05 mmol) in chlorobenzene (3 mL) was added the corresponding aryl alkyne (2 mmol, 10 eq). The solution was stirred at 160 °C for 16 hours, cooled to RT, then precipitated in methanol and filtered. The filtrate was then re-dissolved in minimum chloroform (~ 1 mL) and re-precipitated in methanol a second time to obtain an orange-red solid, which was dried in *vacuo*.

**P2a(i)**

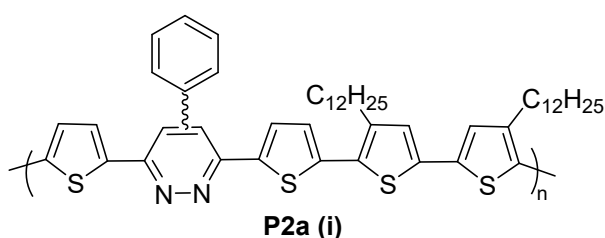

General procedure B was applied to polymer **P1** with phenylacetylene (219  $\mu\text{L}$ , 2 mmol). An orange powder was obtained (35.6 mg, 87%,  $M_n = 5.3$  kDa, PDI = 1.47). IR ( $\lambda_{max}/cm^{-1}$ ) 2922, 2851, 1446, 1384, 1073, 758.  $^1H$  NMR (500.1 MHz,  $CDCl_3$ ) 7.63 – 7.48 (br), 7.47 – 7.38 (br), 7.20 – 7.15 (br), 7.06 – 6.95 (br), 6.90 – 6.84 (br), 6.61 – 6.48 (br), 2.94 – 2.47 (br), 1.75 – 1.08 (m, alkyl peaks), 0.91 – 0.78 (br).

**P2b(i)**

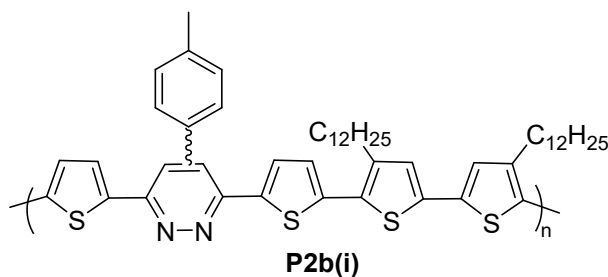

General procedure B was applied to polymer **P1** with *p*-tolylacetylene (253  $\mu\text{L}$ , 2 mmol). An orange powder was obtained (32.1 mg, 77%,  $M_n = 6.0$  kDa, PDI = 1.42). IR ( $\lambda_{max}/cm^{-1}$ ) 2920, 2849, 1437, 1377, 1076, 794.  $^1H$  NMR (500.1 MHz,  $CDCl_3$ ) 7.60 – 7.51 (br), 7.38 – 7.24 (br), 7.20 – 7.15 (br), 7.07 – 6.97 (br), 6.62 – 6.61 (br), 6.55 (br), 2.90 – 2.72 (br), 2.50 – 2.41 (br, phenyl  $CH_3$ ), 1.75 – 1.03 (m, alkyl peaks), 0.90 – 0.78 (br).

**P2c(i)**

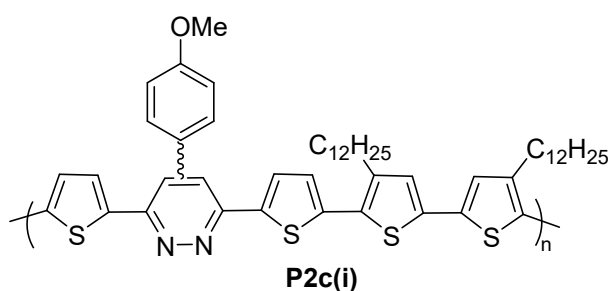

General procedure B was applied to polymer **P1** with 4-ethynylanisole (258  $\mu\text{L}$ , 2 mmol). An orange powder was obtained (37.2 mg, 88%,  $M_n = 5.9$  kDa, PDI = 1.43). IR ( $\lambda_{max}/cm^{-1}$ ) 2920, 2850, 1607, 1438, 1378, 1290, 1248, 1174, 1030, 830, 793.  $^1H$  NMR (500.1 MHz,  $CDCl_3$ ) 7.60 – 7.50 (br), 7.38 – 7.30 (br), 7.20 – 7.15 (br), 7.10 – 6.95 (br), 6.92 – 6.85 (br), 6.70 – 6.65 (br), 3.91 (s, OMe), 2.88 – 2.72 (br), 1.75 – 0.92 (m, alkyl peaks), 0.89 – 0.77 (br).

P2d(i)

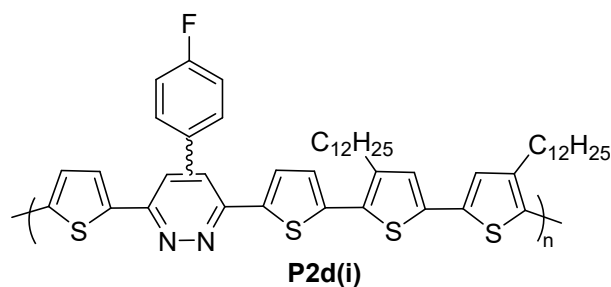

General procedure B was applied to polymer **P1** with 1-ethynyl-4-fluorobenzene (228  $\mu\text{L}$ , 2 mmol). An orange powder was obtained (25.9 mg, 62%,  $M_n = 6.2$  kDa, PDI = 1.38). IR ( $\lambda_{\text{max}}/\text{cm}^{-1}$ ) 2921, 2850, 1437, 1379, 1231, 1158, 1077, 835, 790.  $^1\text{H}$  NMR (500.1 MHz,  $\text{CDCl}_3$ ) 7.62 – 7.50 (br), 7.45 – 7.38 (br), 7.30 – 7.20 (br), 7.05 – 6.96 (br), 6.92 – 6.88 (br), 6.62 (s), 6.54 (s), 2.87 – 2.48 (br), 2.26 (s), 1.78 (s), 1.73 – 0.95 (m, alkyl peaks), 0.92 – 0.76 (br).  $^{19}\text{F}$  NMR (470.6 MHz,  $\text{CDCl}_3$ ) 111.1.

P2e(i)

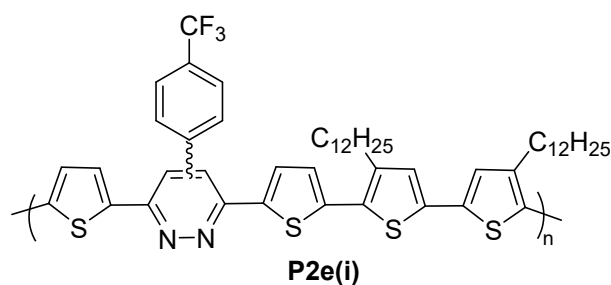

General procedure B was applied to polymer **P1** with 4-ethynyl- $\alpha,\alpha,\alpha$ -trifluorotoluene (327  $\mu\text{L}$ , 2 mmol). An orange powder was obtained (28.9 mg, 65%,  $M_n = 5.4$  kDa, PDI = 1.43). IR ( $\lambda_{\text{max}}/\text{cm}^{-1}$ ) 2922, 2851, 1578, 1441, 1380, 1322, 1167, 1129, 1068, 843, 791.  $^1\text{H}$  NMR (500.1 MHz,  $\text{CDCl}_3$ ) 7.82 – 7.79 (br), 7.62 – 7.50 (br), 7.20 – 7.15 (br), 7.06 – 6.95 (br), 6.92 – 6.85 (br), 6.62 (s), 6.54 – 6.50 (br), 2.87 – 2.48 (br), 2.26 (s), 1.77 (s), 1.74 – 1.03 (m, alkyl peaks), 0.91 – 0.77 (br).  $^{19}\text{F}$  NMR (470.6 MHz,  $\text{CDCl}_3$ ) 62.5.

## UV Spectra of partially modified polymer

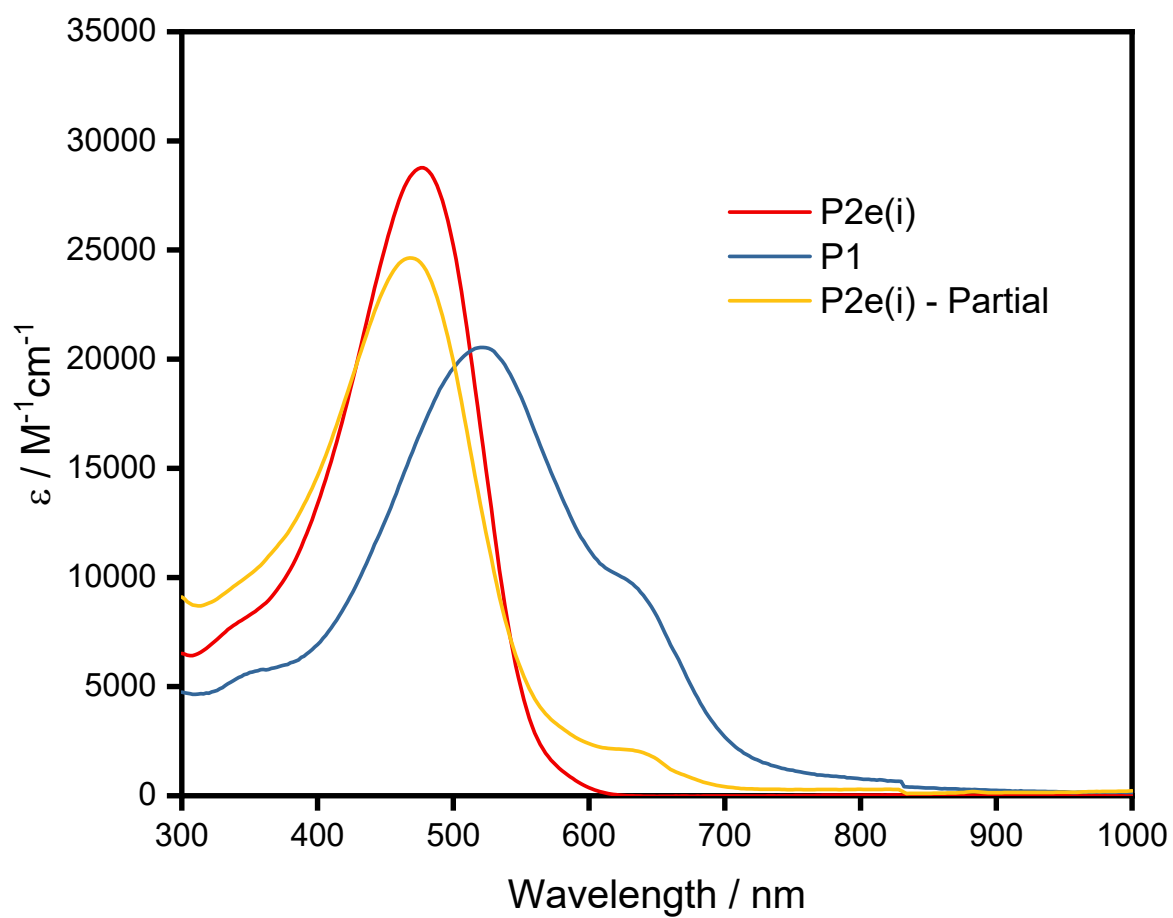

**Figure S1:** UV Spectra of P1 reacted with 1 eq of arylalkyne (**P2e(i) partial**) and 10 eq of aryl alkyne (**P2e(i)**).

## UV spectra of polymers with addition of TFA

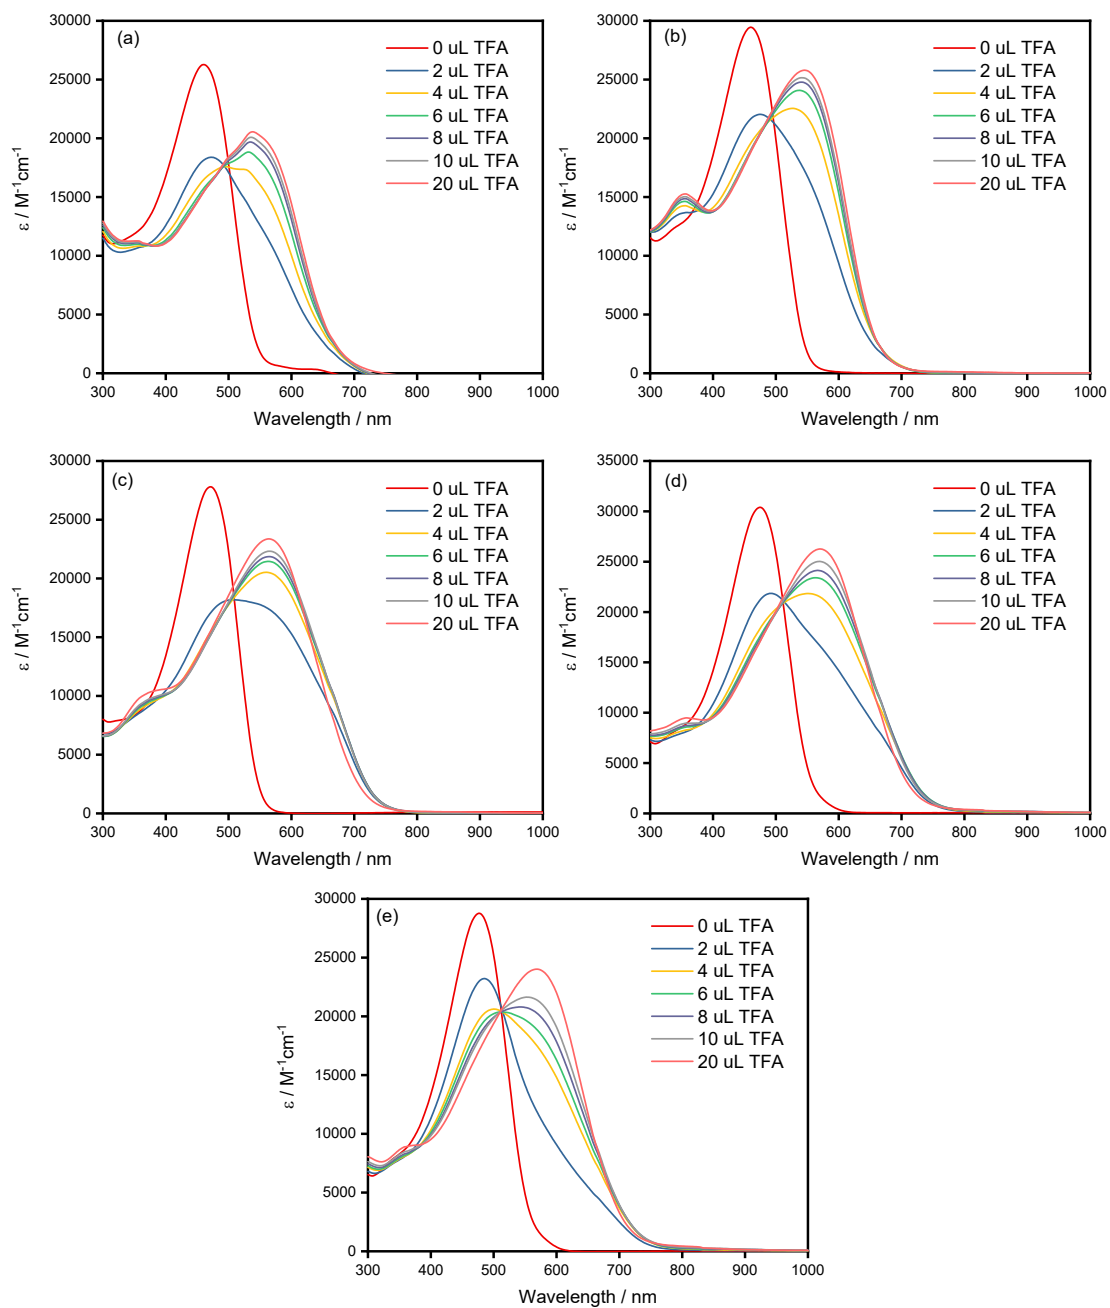

**Figure S2:** UV Spectra of polymers with iterative addition of TFA. (a) P2a(i). (b) P2b(i). (c) P2c(i). (d) P2d(i). (e) P2e(i).

# Fluorescence quenching of polymers with metal ions

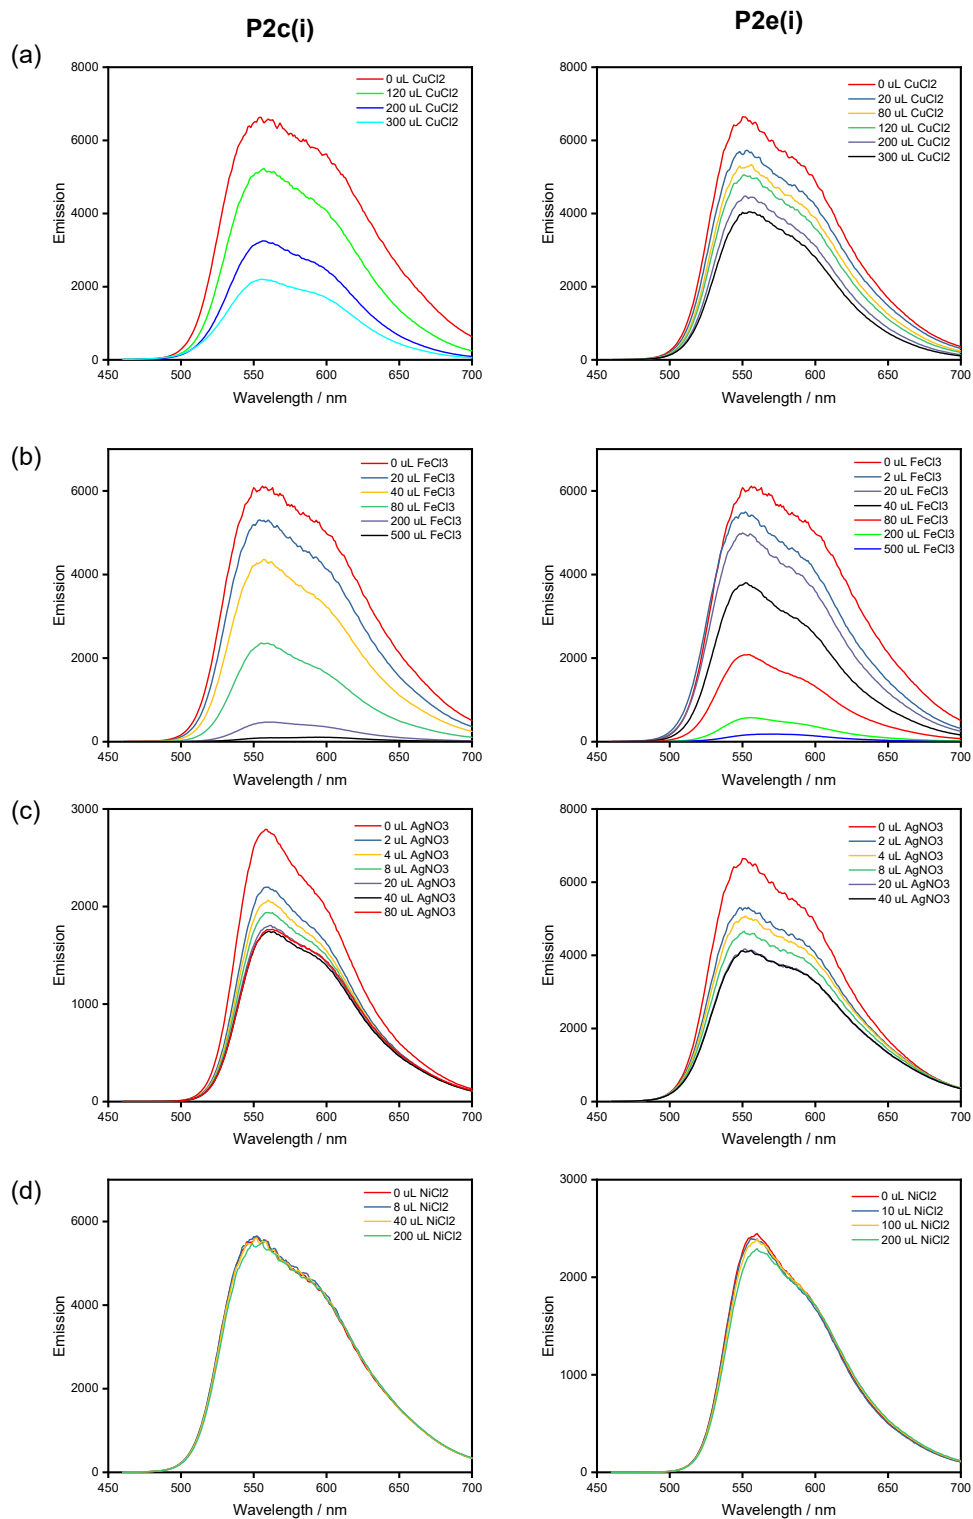

**Figure S3:** Emission spectra of polymers with iterative addition of metal ions. Left: **P2c(i)**, right: **P2e(i)**. (a) Addition of  $\text{CuCl}_2$ , (b)  $\text{FeCl}_3$ , (c)  $\text{AgNO}_3$ , (d)  $\text{NiCl}_2$ . All metal concentrations were  $100 \text{ mg mL}^{-1}$  in water. Measurements were conducted in THF with a concentration of  $\sim 2.5 \times 10^{-5} \text{ M}$ .



## References

- 1 Q. Ye, W. T. Neo, C. M. Cho, S. W. Yang, T. Lin, H. Zhou, H. Yan, X. Lu, C. Chi and J. Xu, *Org. Lett.*, 2014, **16**, 6386–6389.

# Appendix A: $^1\text{H}$ , $^{13}\text{C}$ and $^{19}\text{F}$ NMR spectra

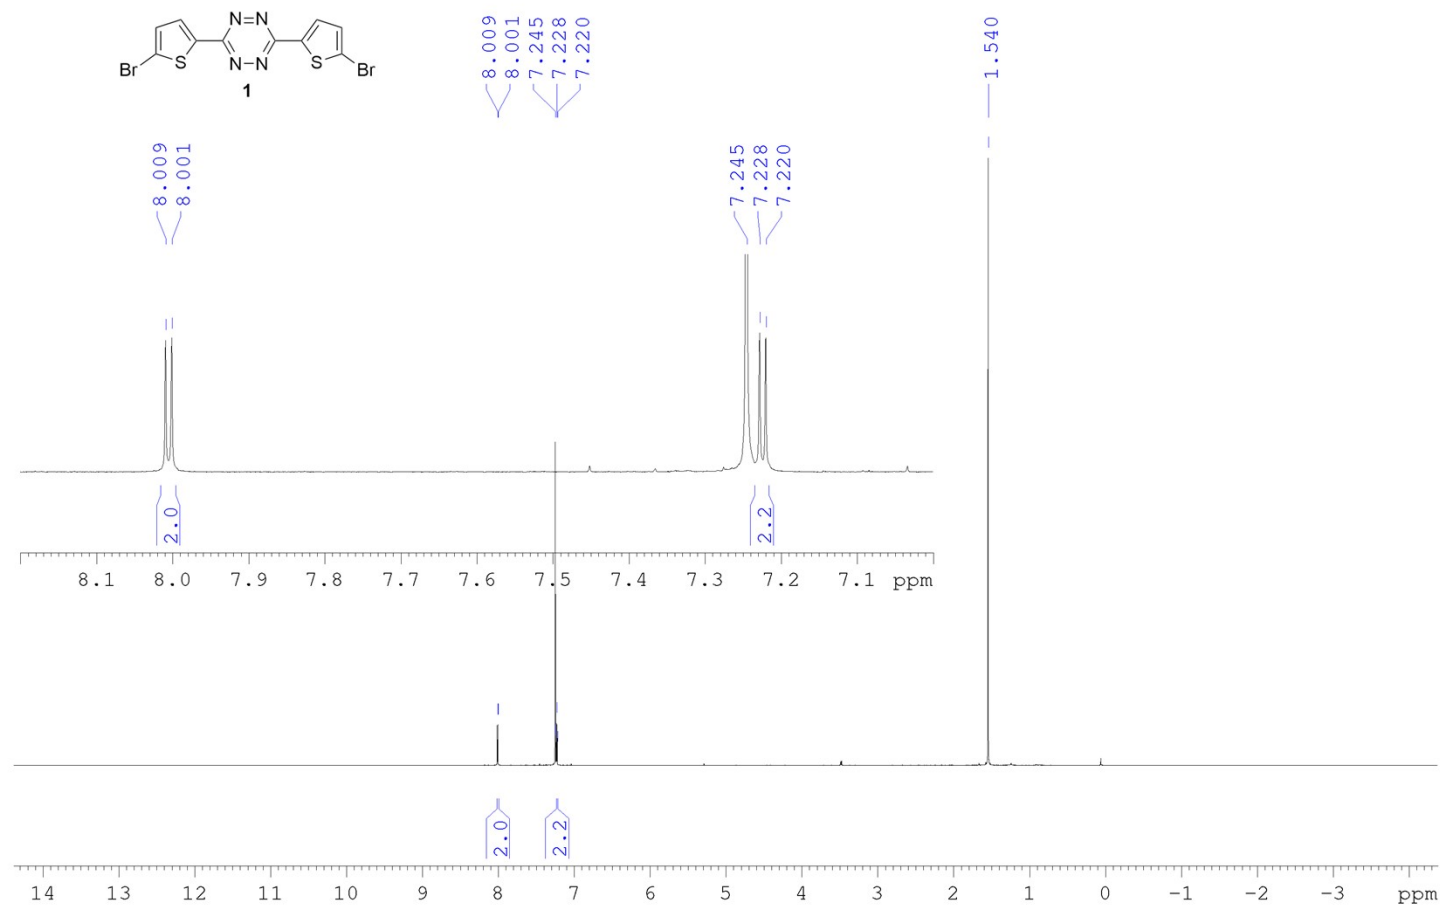

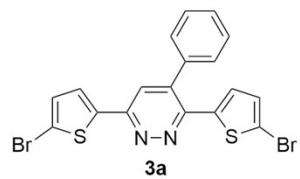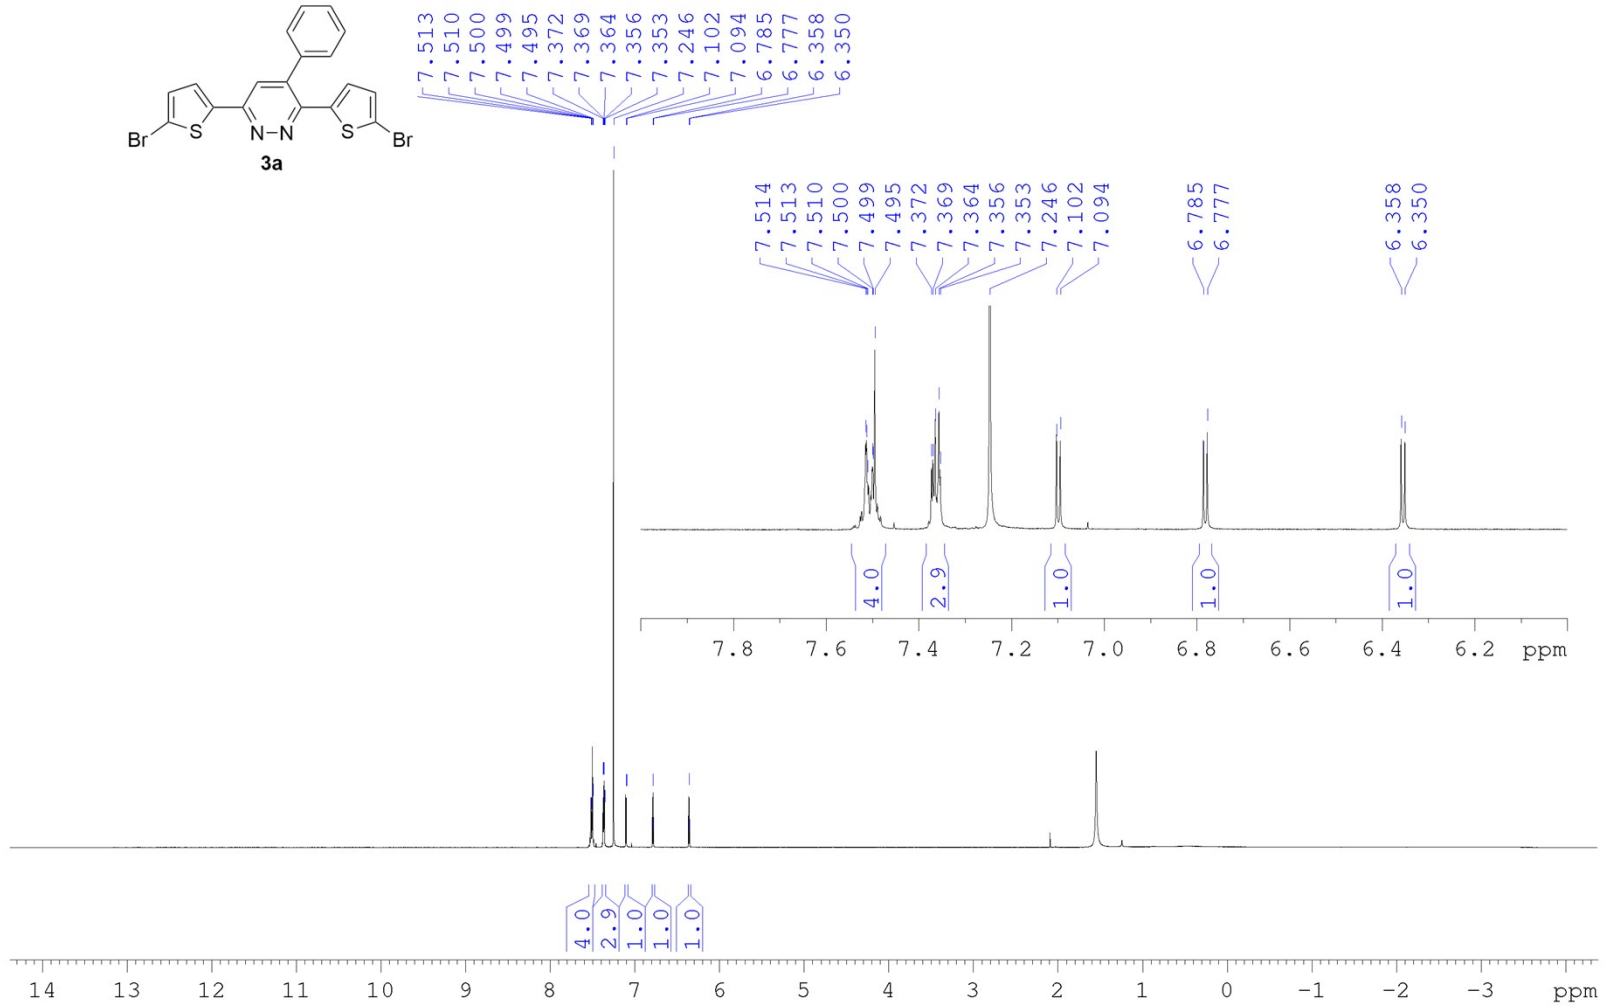

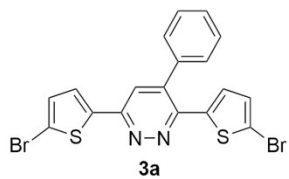

152.014  
151.647  
141.369  
141.276  
138.352  
136.257  
131.268  
130.684  
129.990  
129.737  
129.428  
128.443  
128.432  
128.422  
126.797  
123.319  
117.718  
117.585

152.014  
151.647

141.369  
141.276

138.352

136.257

131.268  
130.684  
129.990  
129.737  
129.428  
128.443  
128.432  
128.422  
126.797

123.319

117.718  
117.585

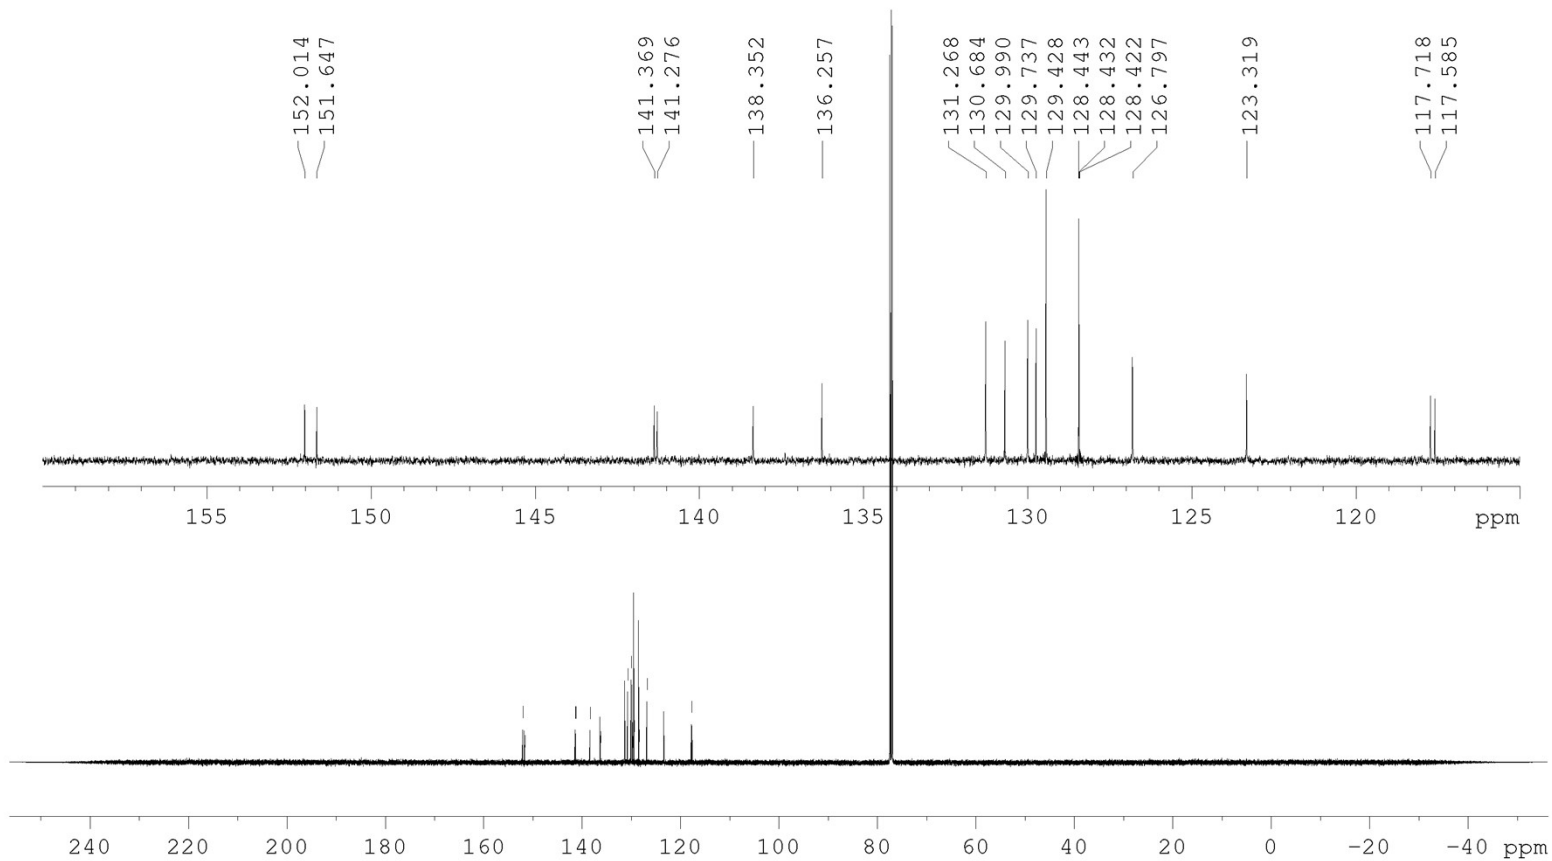

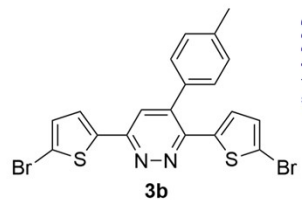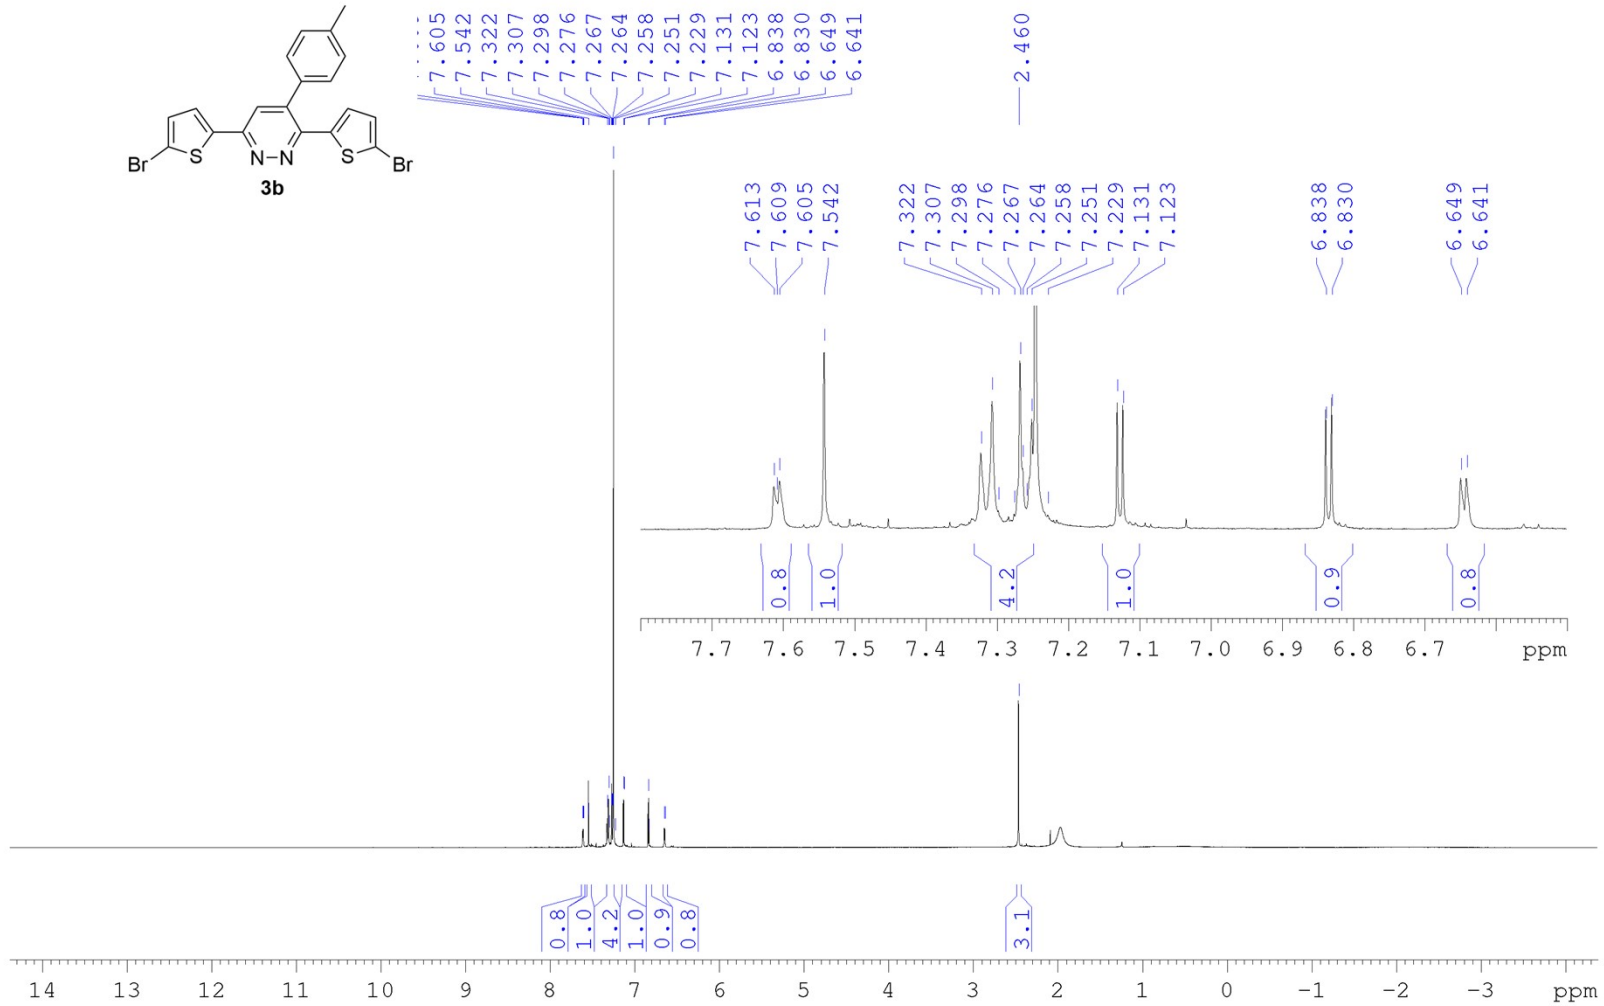

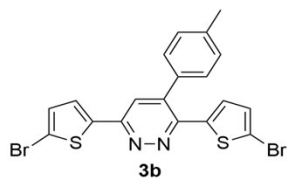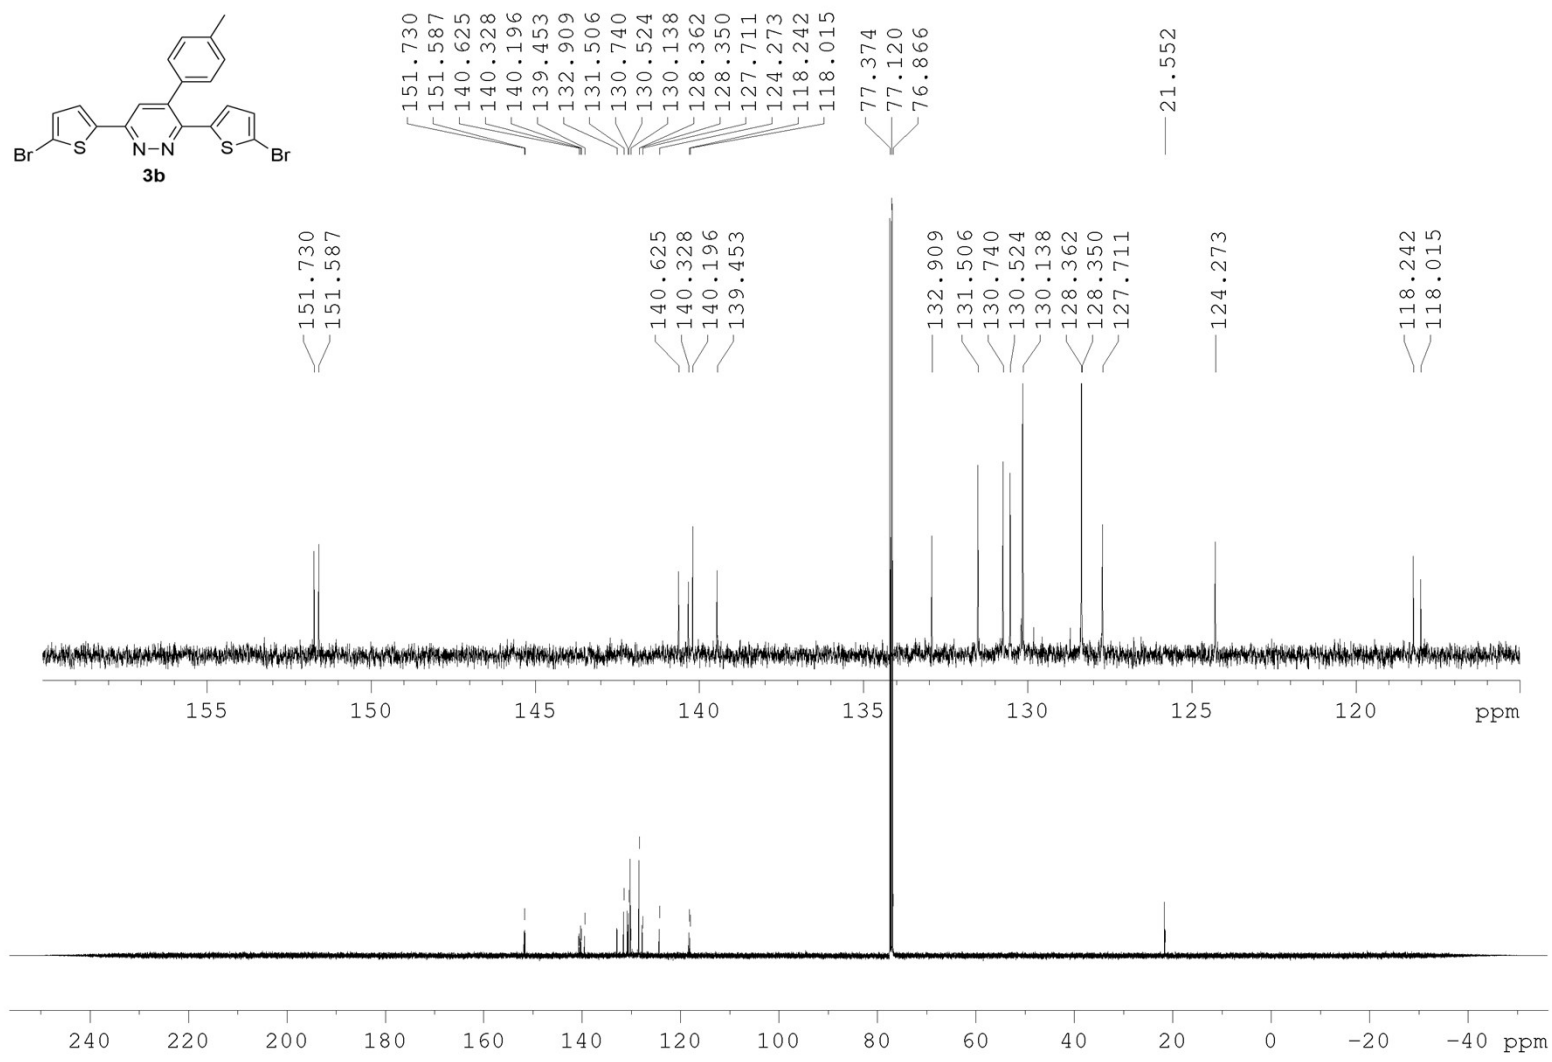

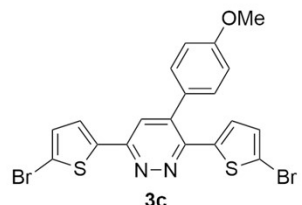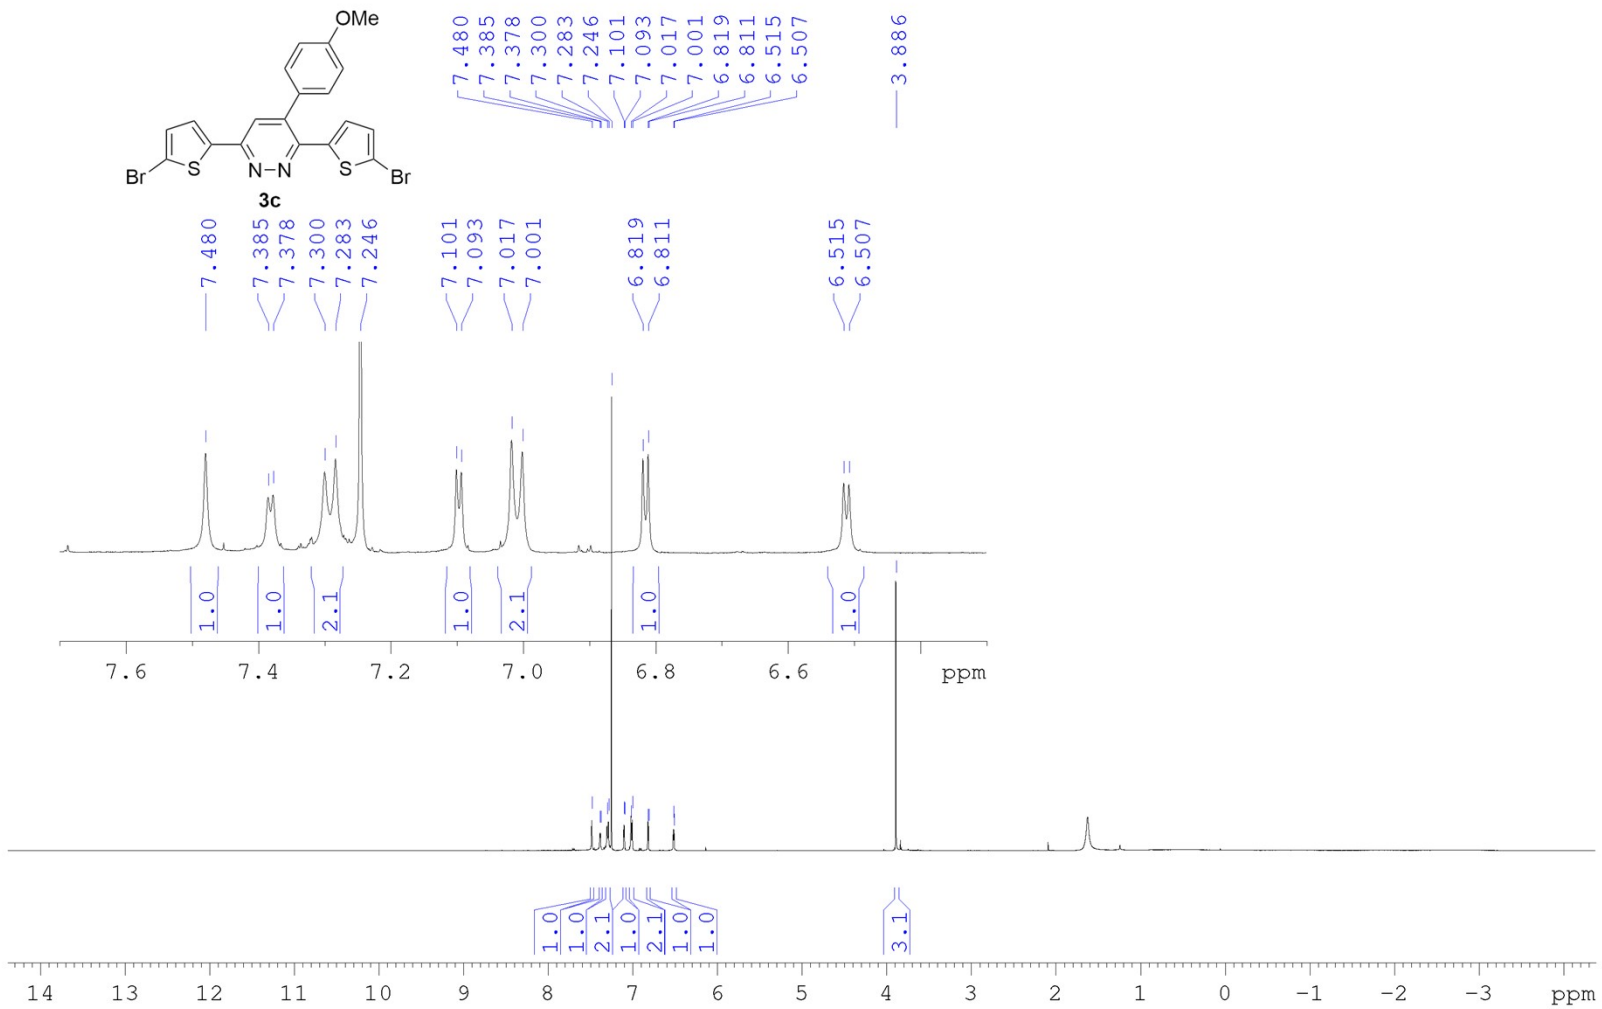

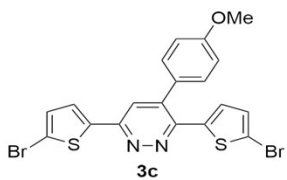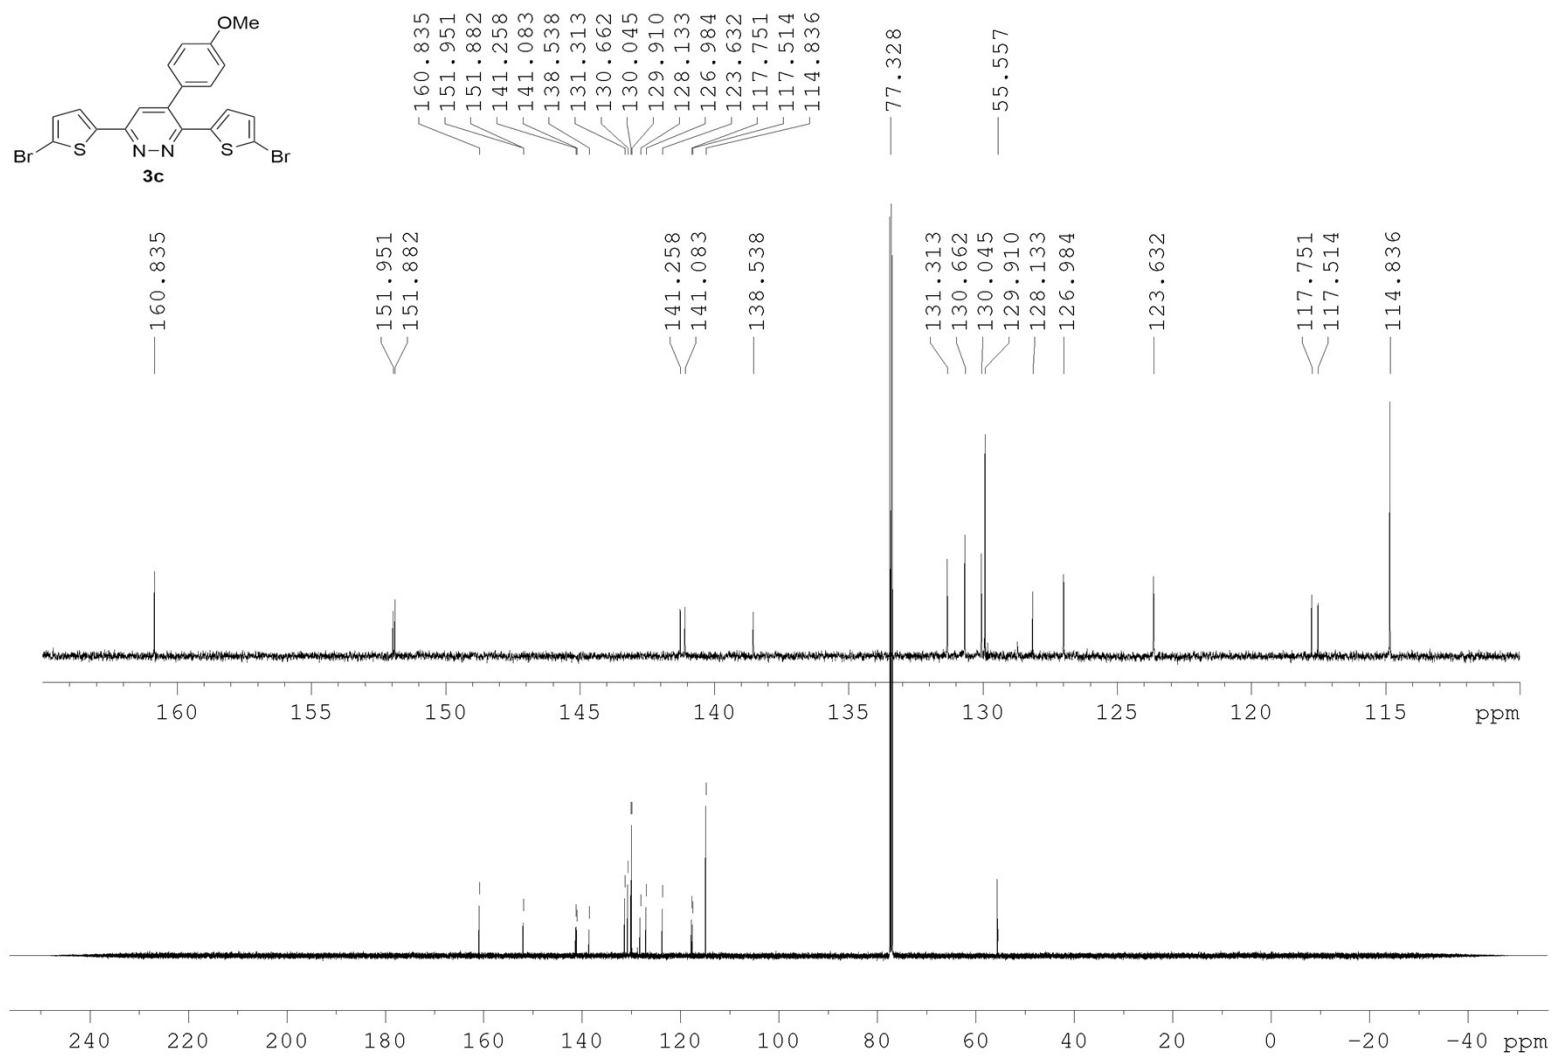



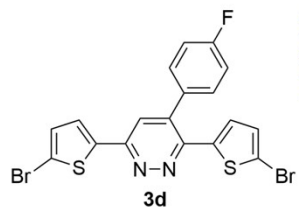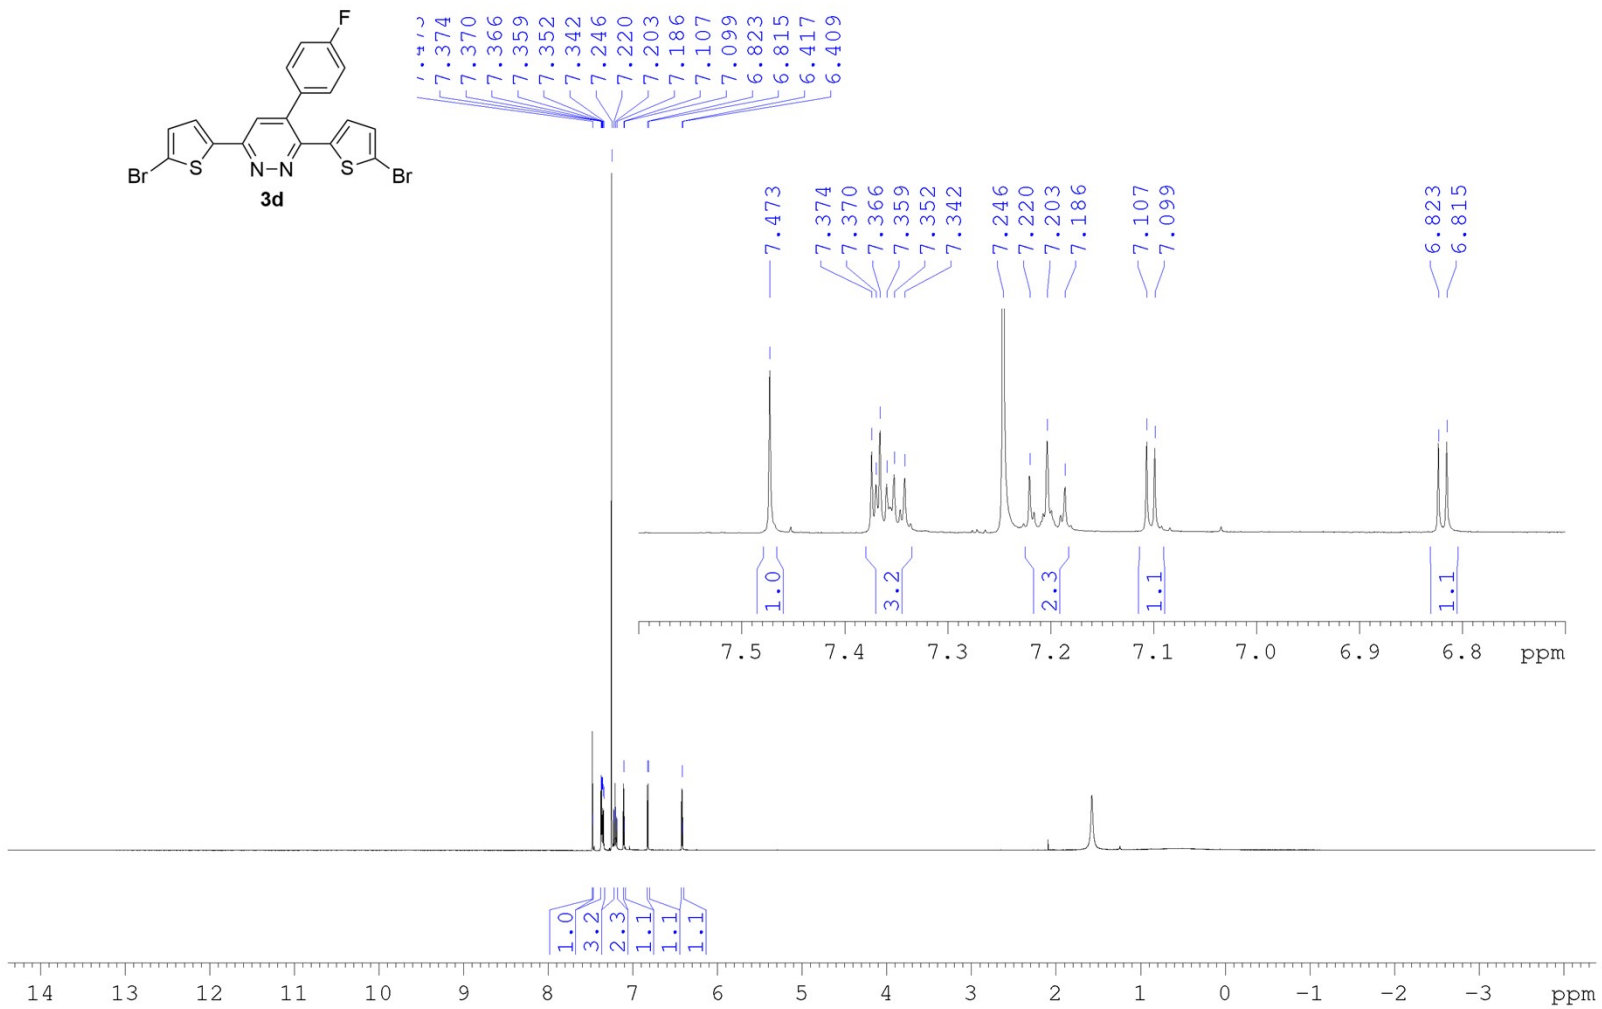

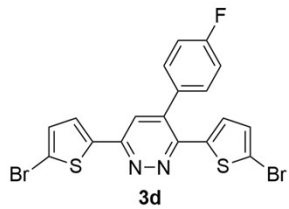

164.563  
162.569  
152.107  
151.674  
141.250  
141.240  
141.233  
137.293  
137.278  
132.235  
131.261  
130.695  
130.543  
130.476  
129.855  
126.756  
123.252  
117.689  
116.779  
116.605

162.569

152.107  
151.674

141.250  
141.240  
141.233

137.293  
137.278

132.235  
131.261  
130.695  
130.543  
130.476  
129.855

126.756

123.252

117.689  
116.779  
116.605

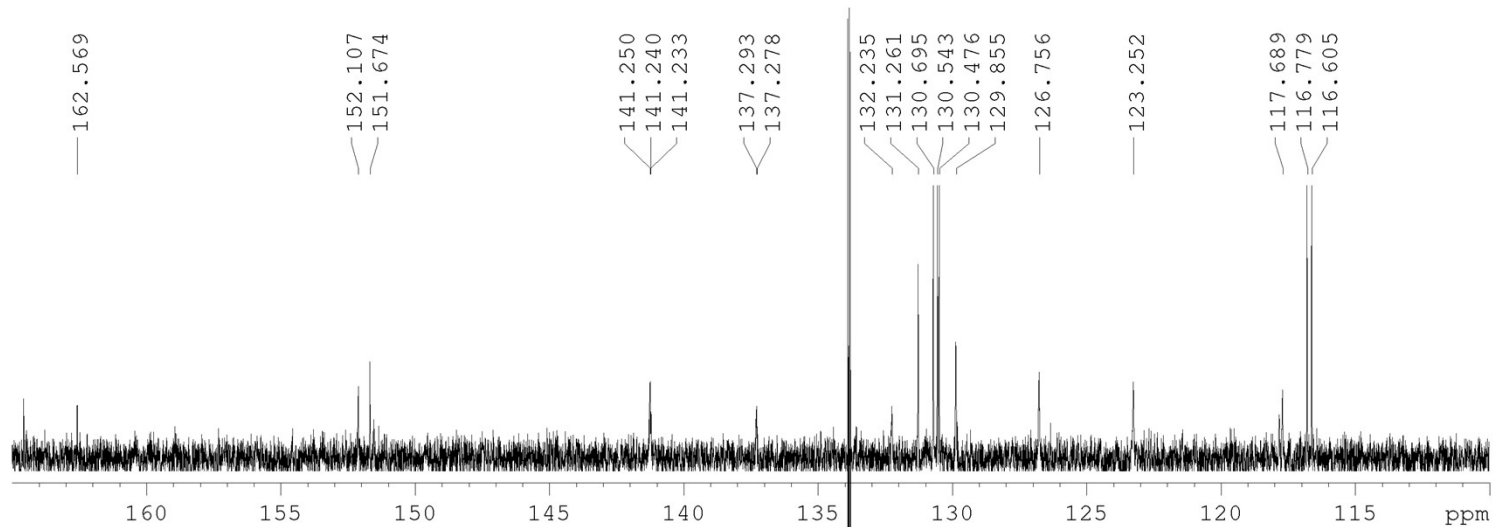

240 220 200 180 160 140 120 100 80 60 40 20 0 -20 -40 ppm

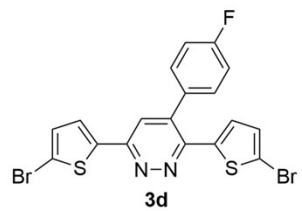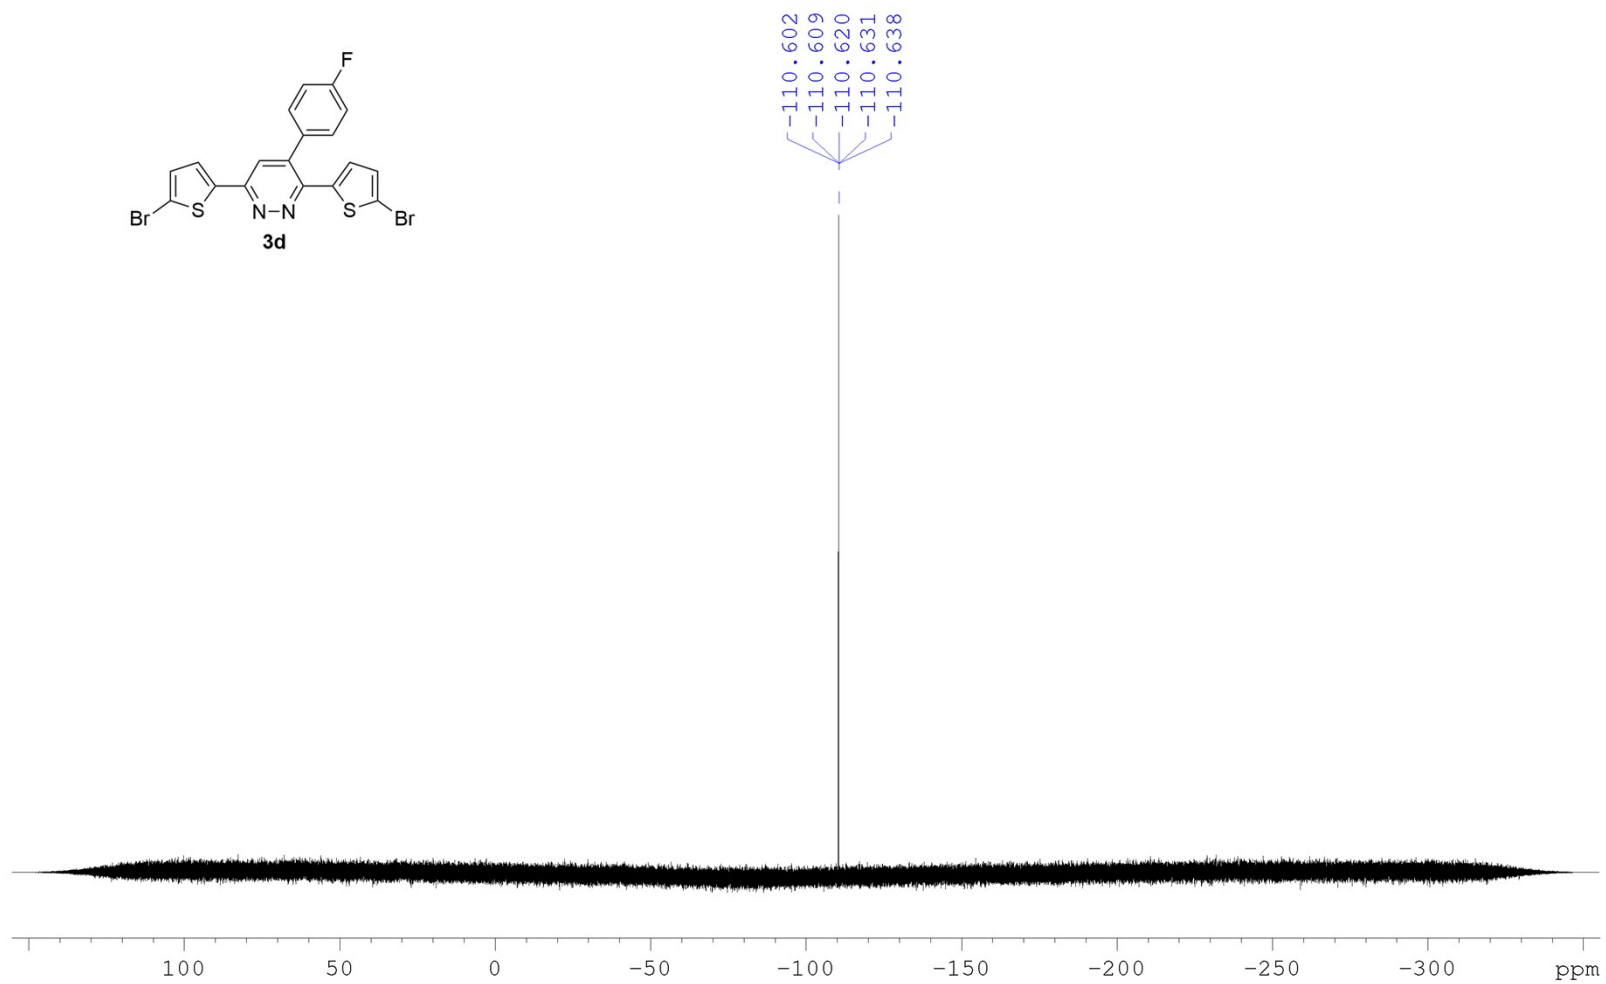

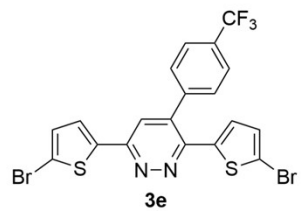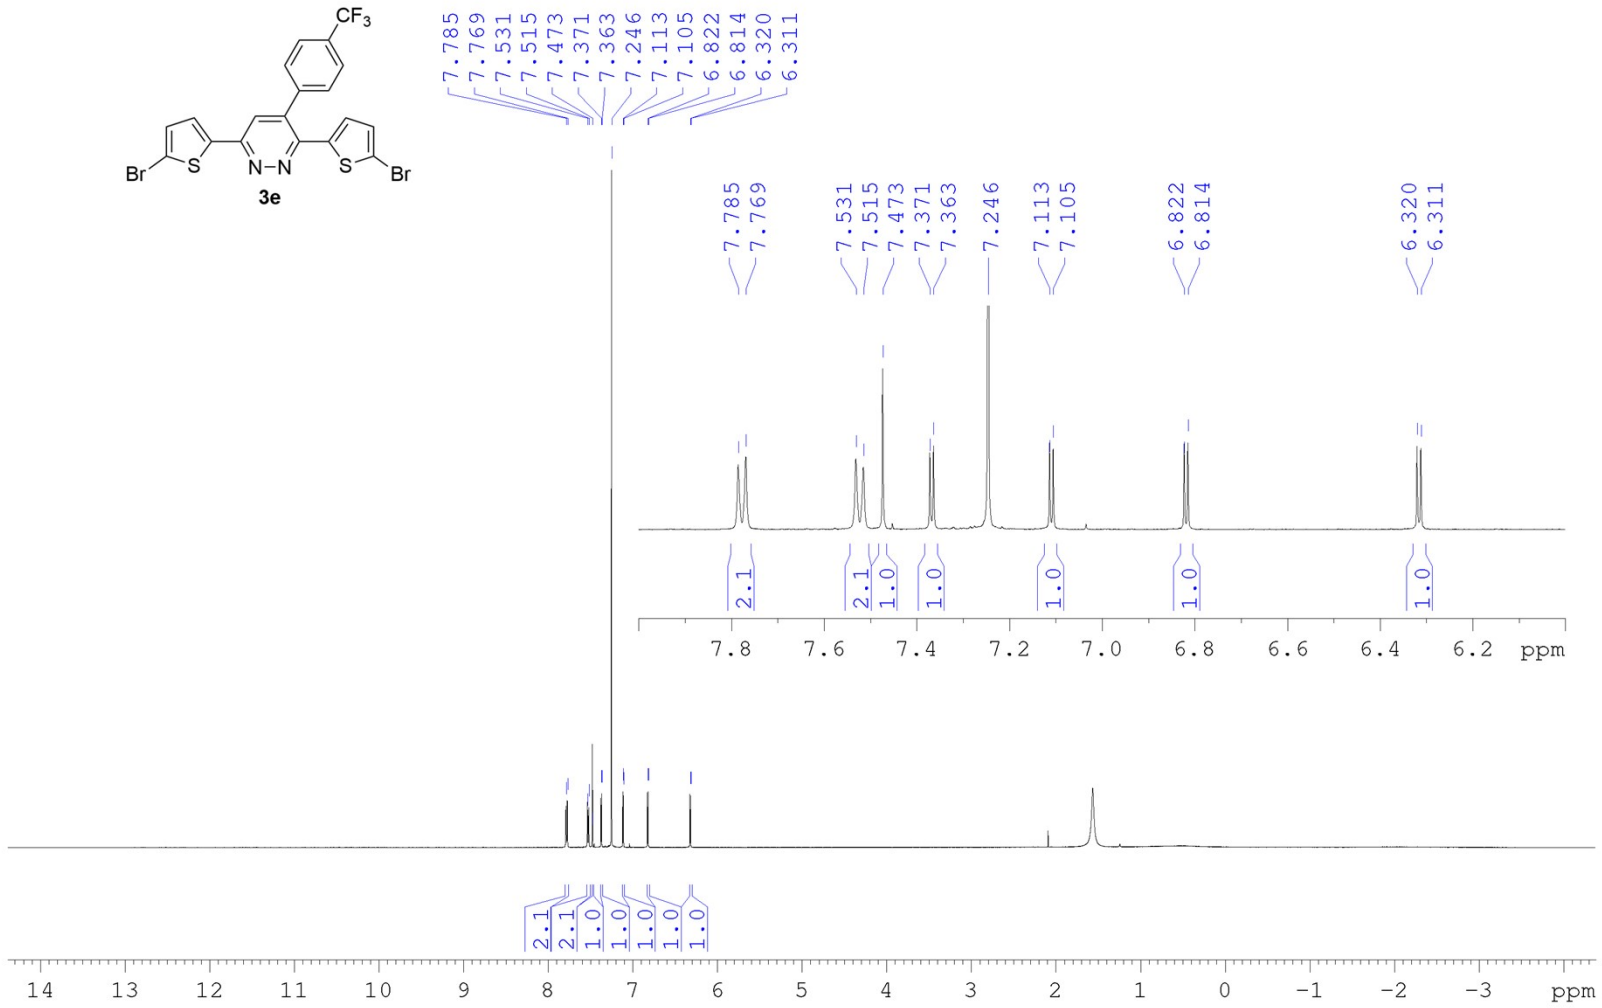

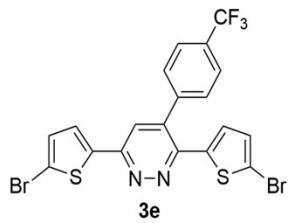

152.092  
151.118  
140.957  
140.908  
140.897  
140.000  
136.779  
132.055  
131.336  
130.848  
129.967  
129.098  
126.993  
126.980  
126.957  
126.494  
126.465  
126.436  
126.408  
124.880  
123.111  
123.103  
122.714  
118.089  
118.081  
117.991

152.092  
151.118

140.957  
140.908  
140.897  
140.000

136.779

132.055  
131.336  
130.848  
129.967  
129.098  
126.993  
126.980  
126.957  
126.494  
126.465  
126.436  
126.408  
124.880  
123.111  
123.103  
122.714

118.089  
118.081  
117.991

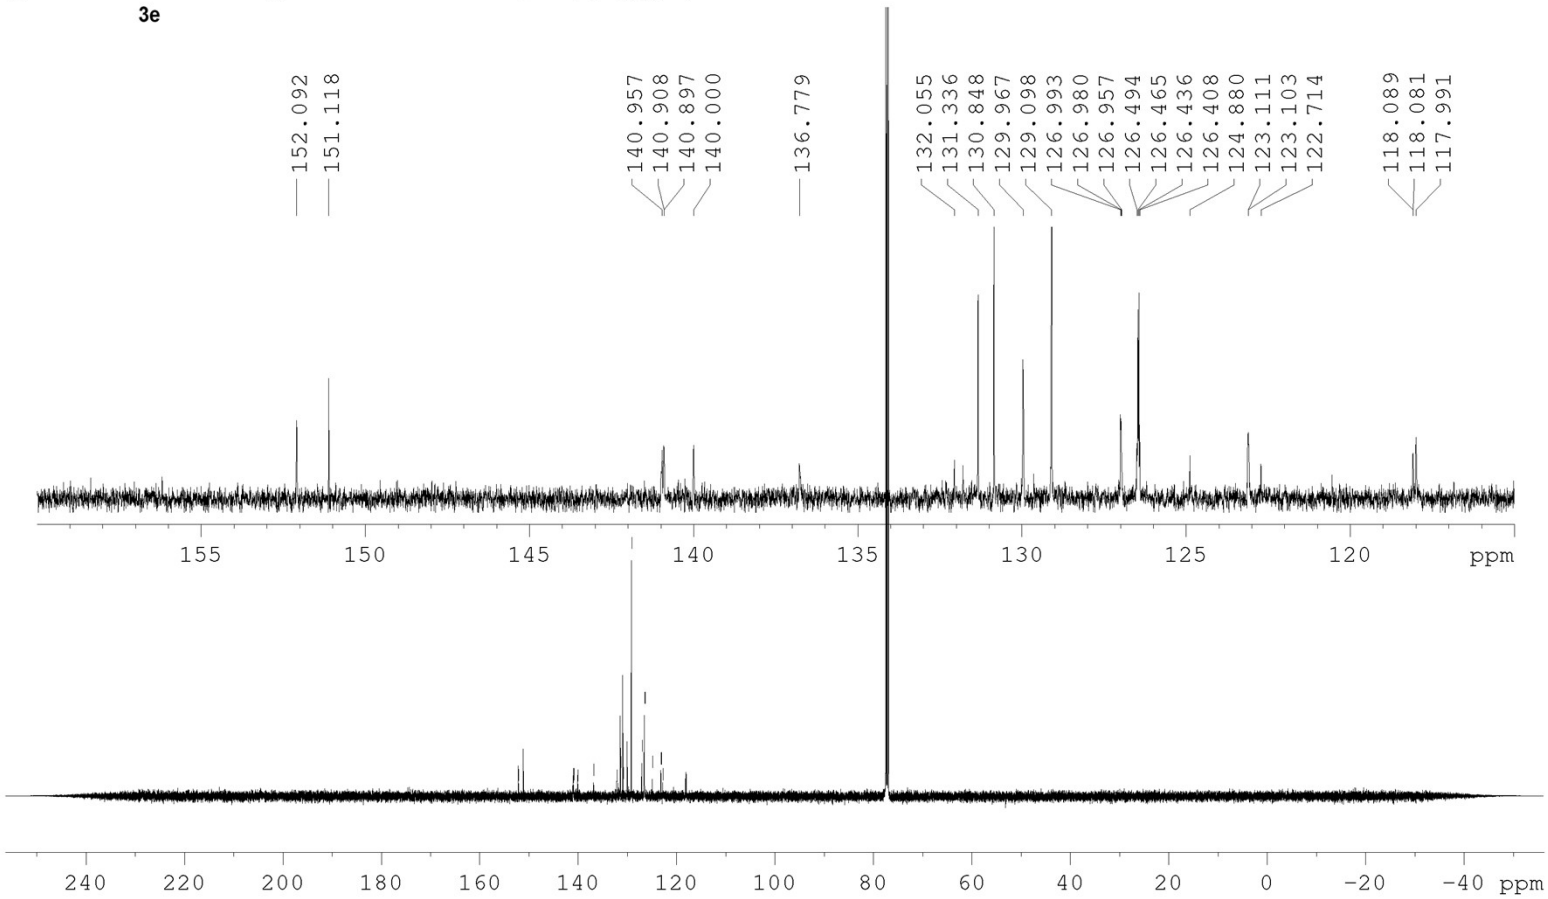

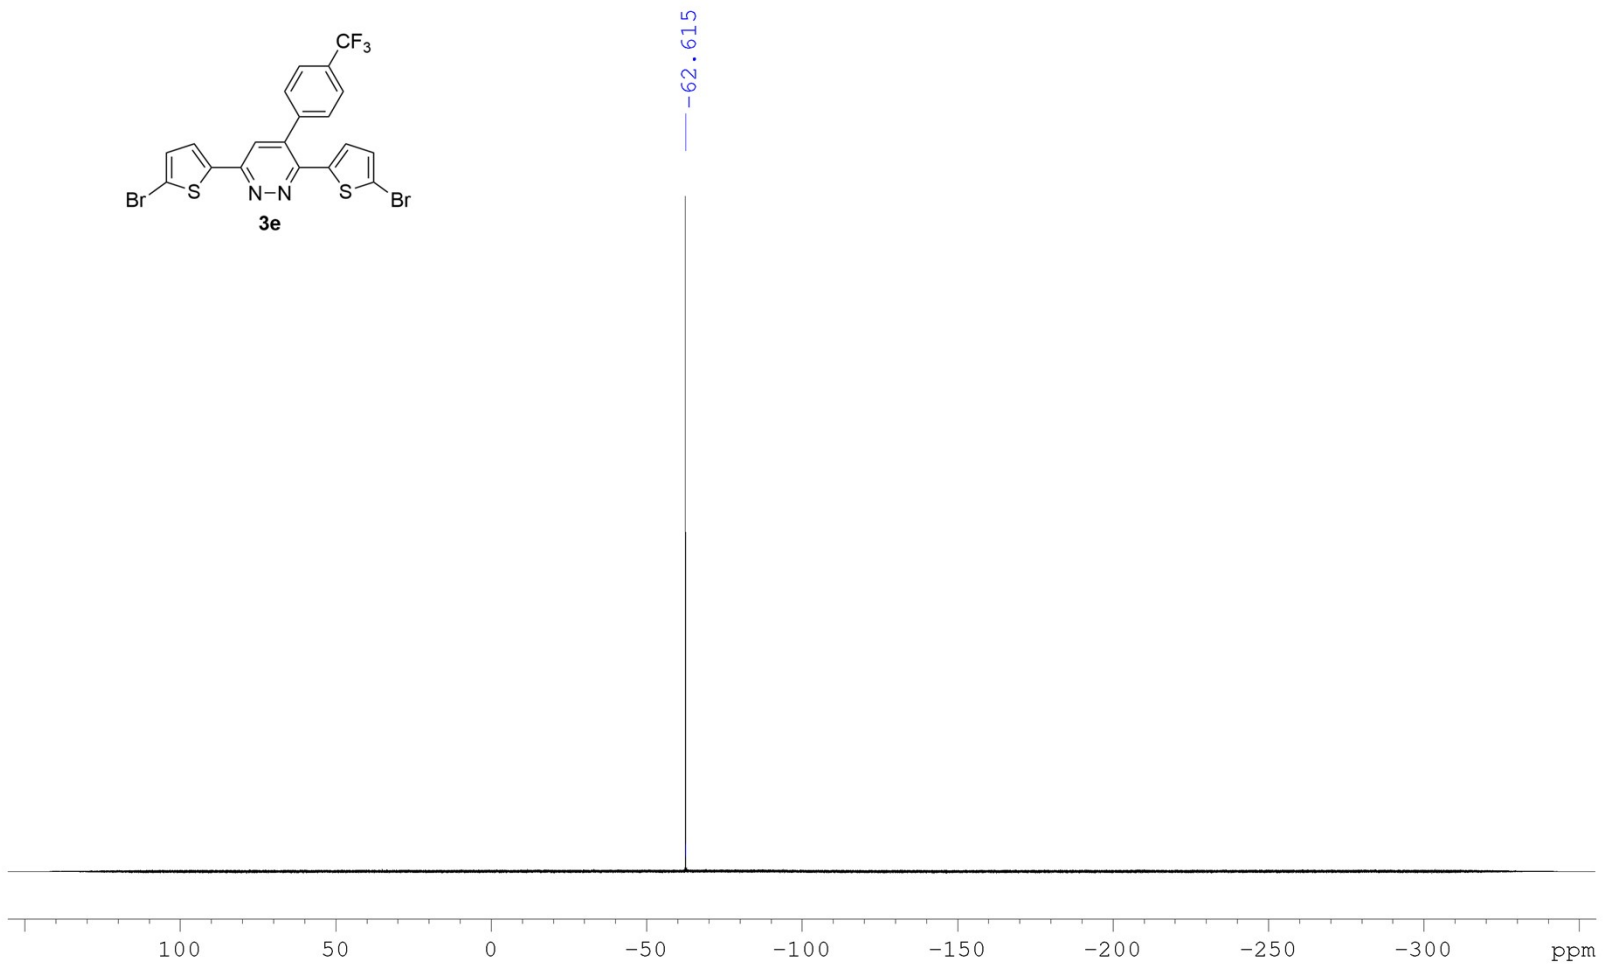

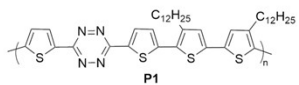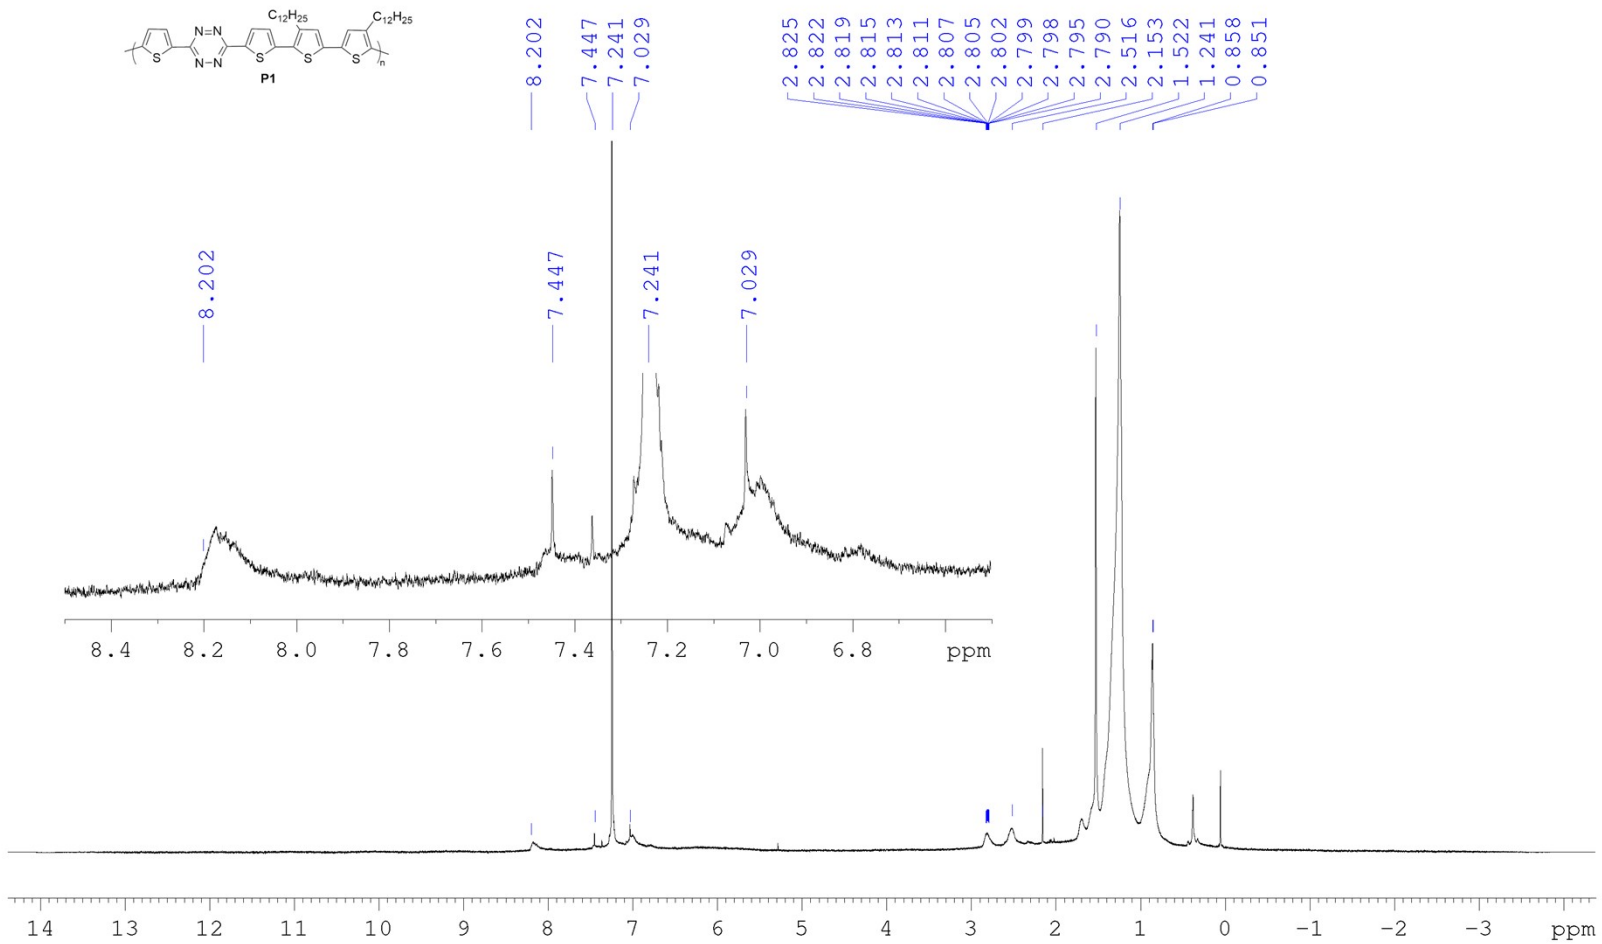

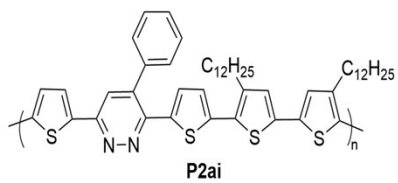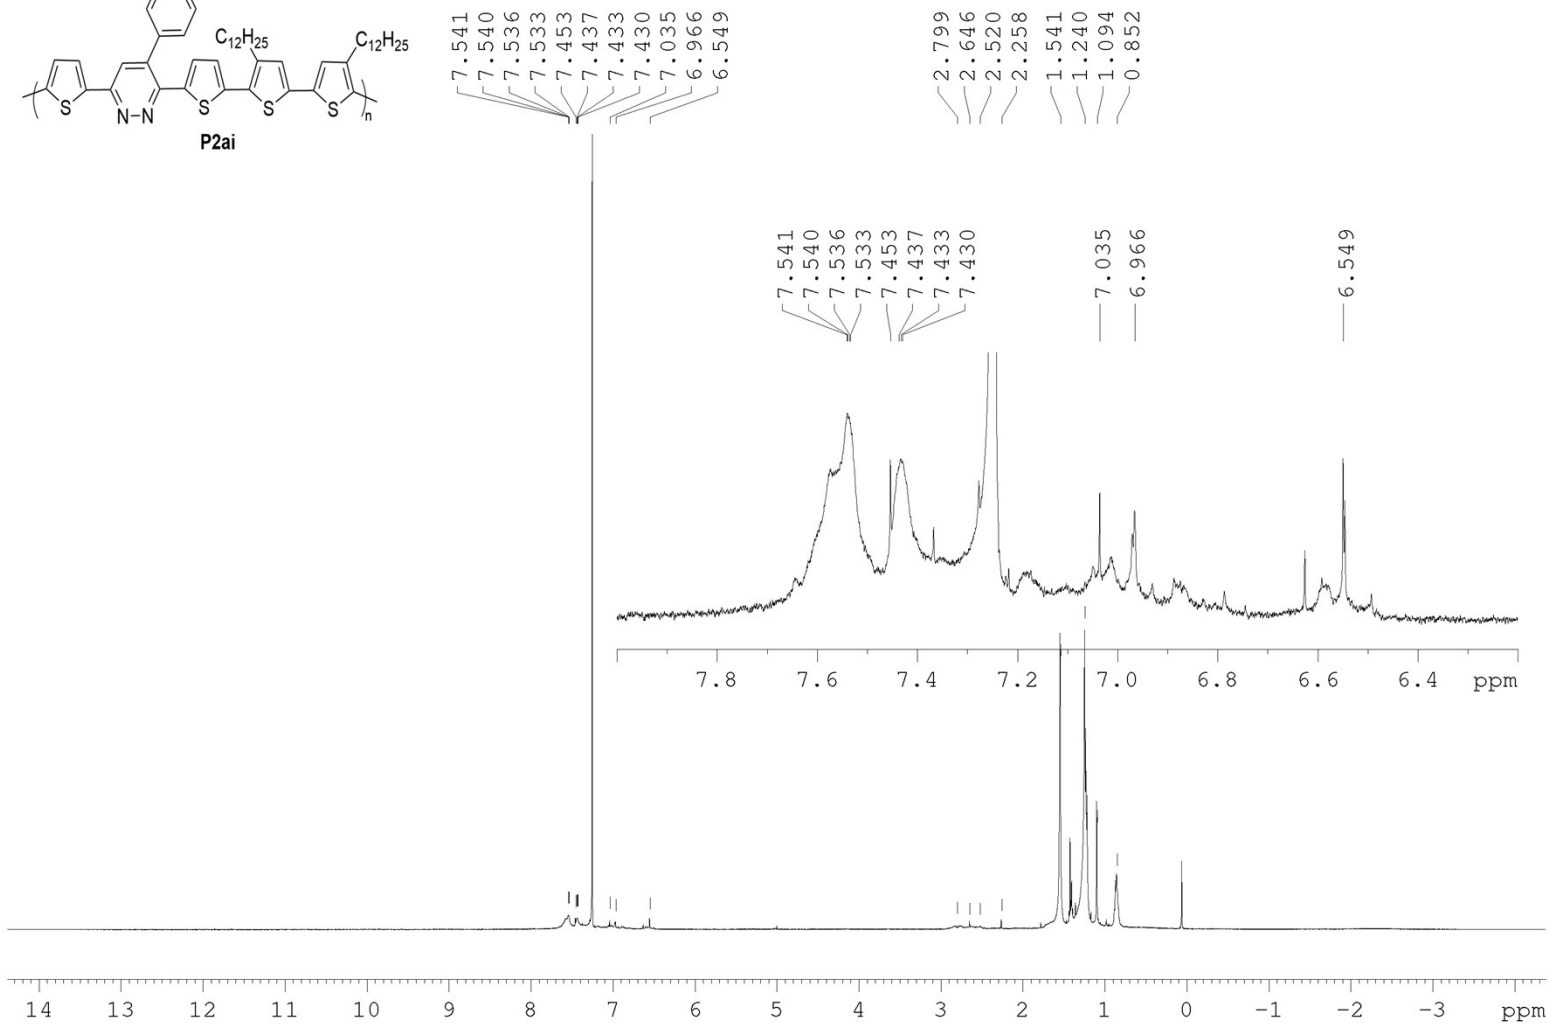



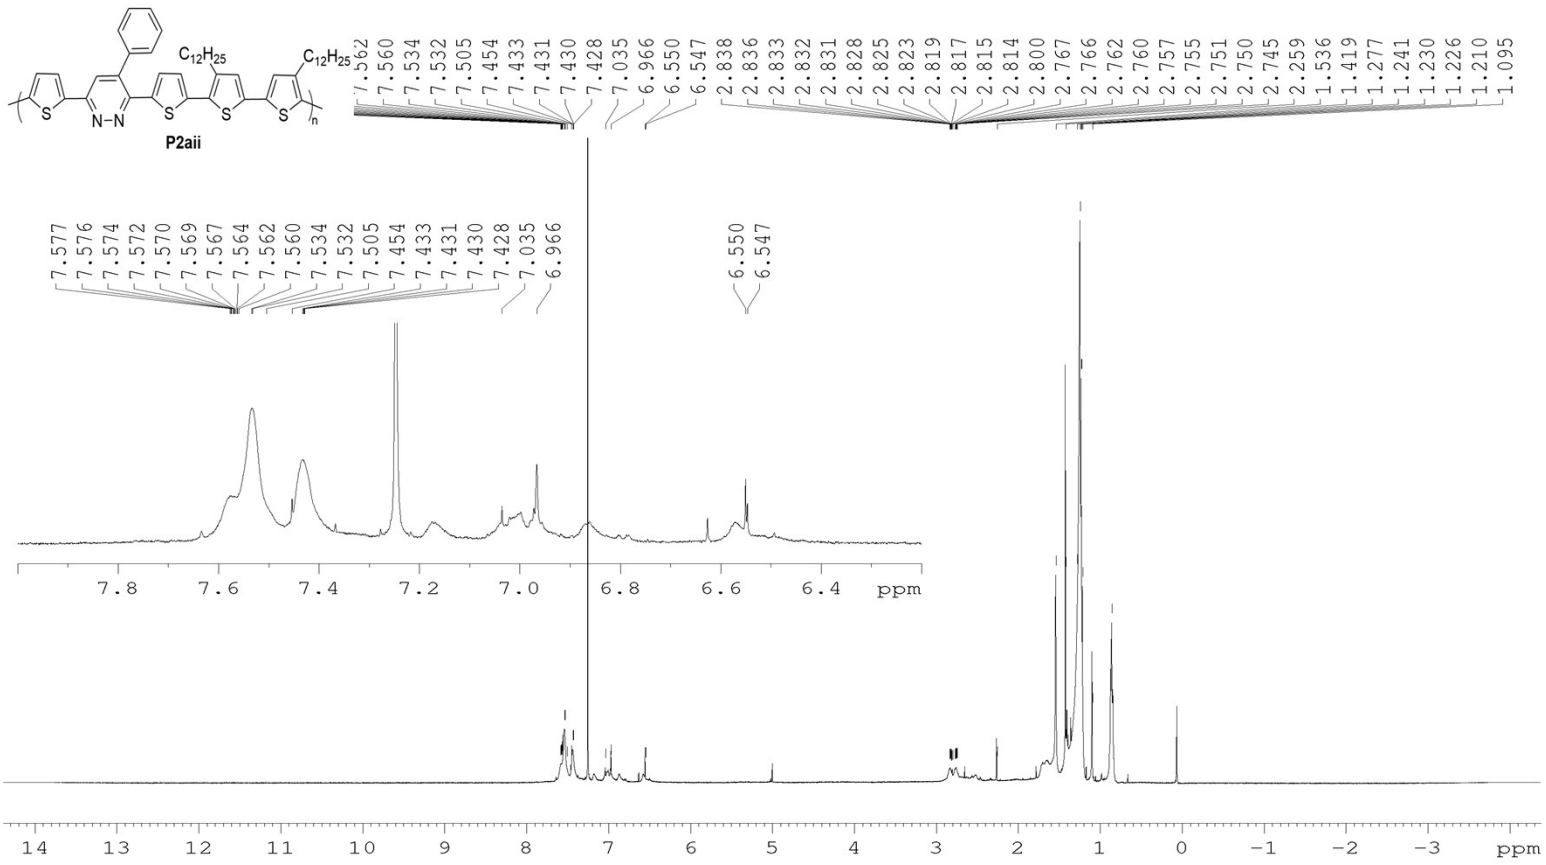

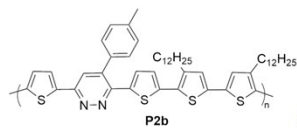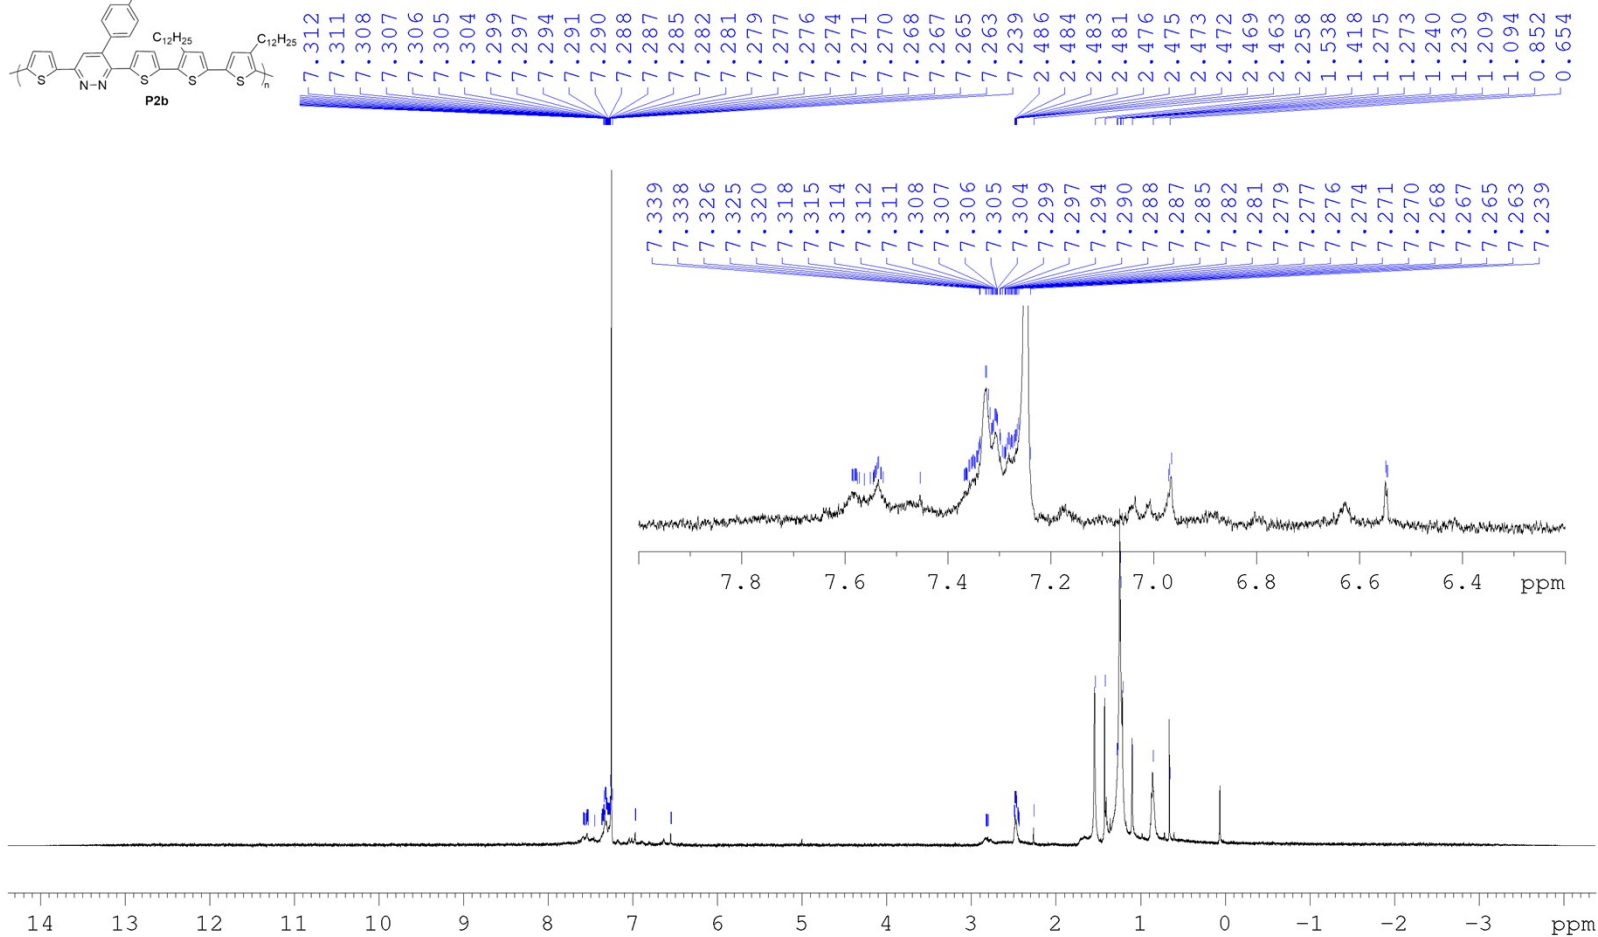

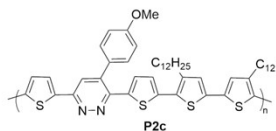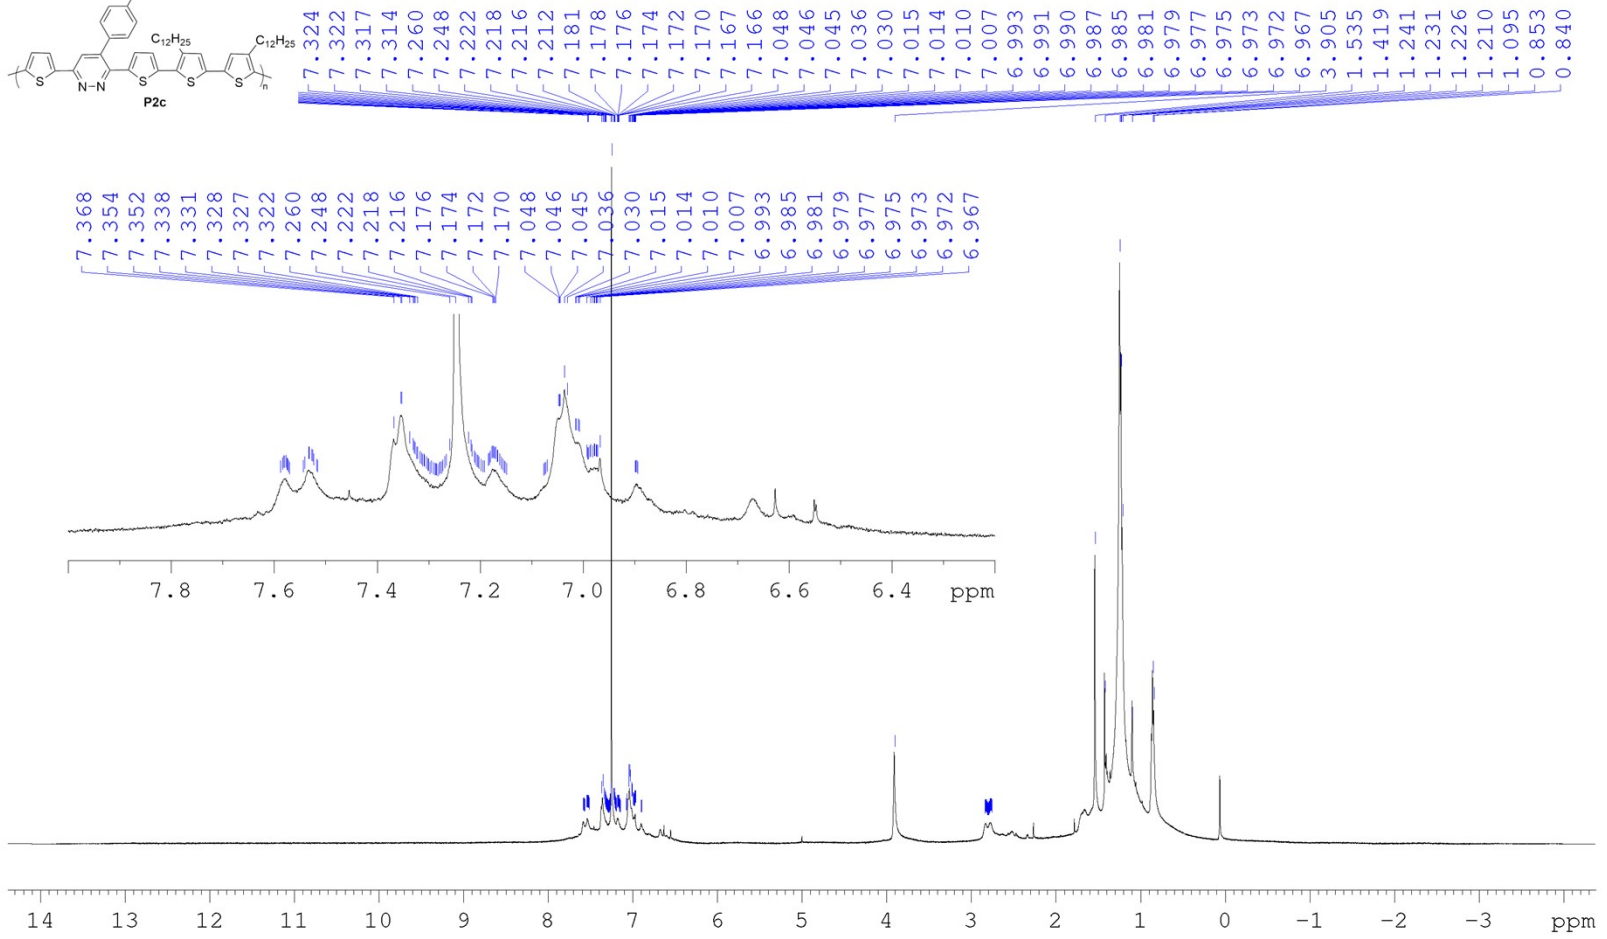

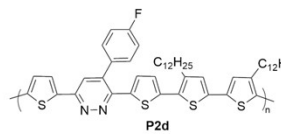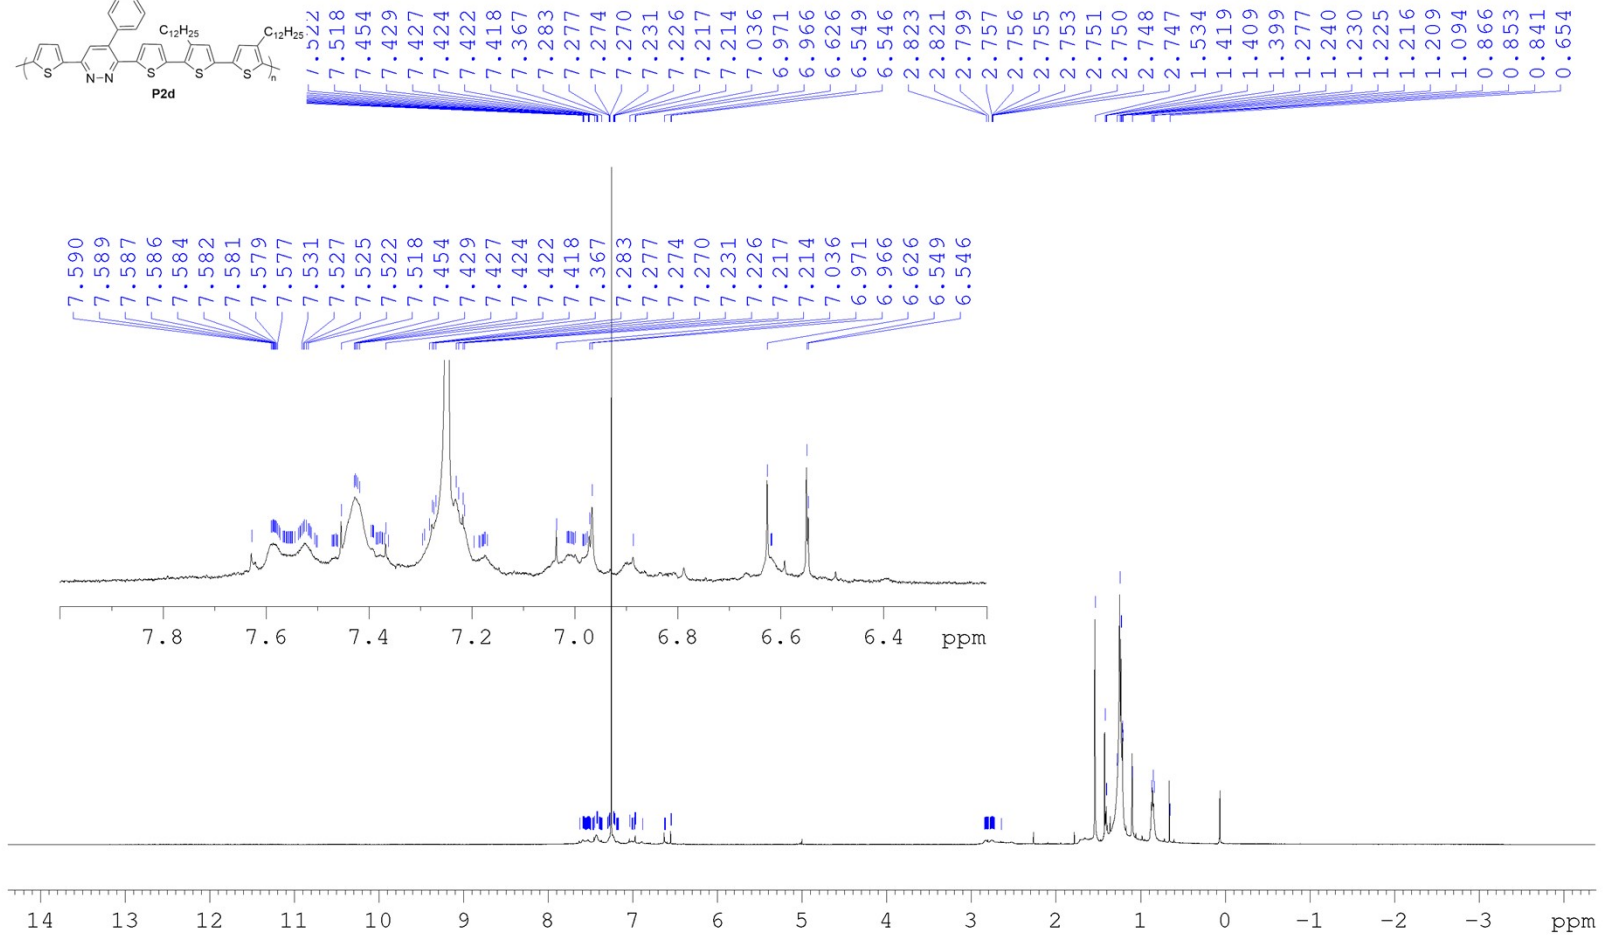

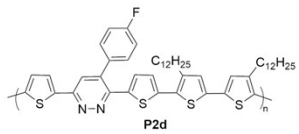

-111.067  
-111.073  
-111.079  
-111.083  
-111.088  
-111.094

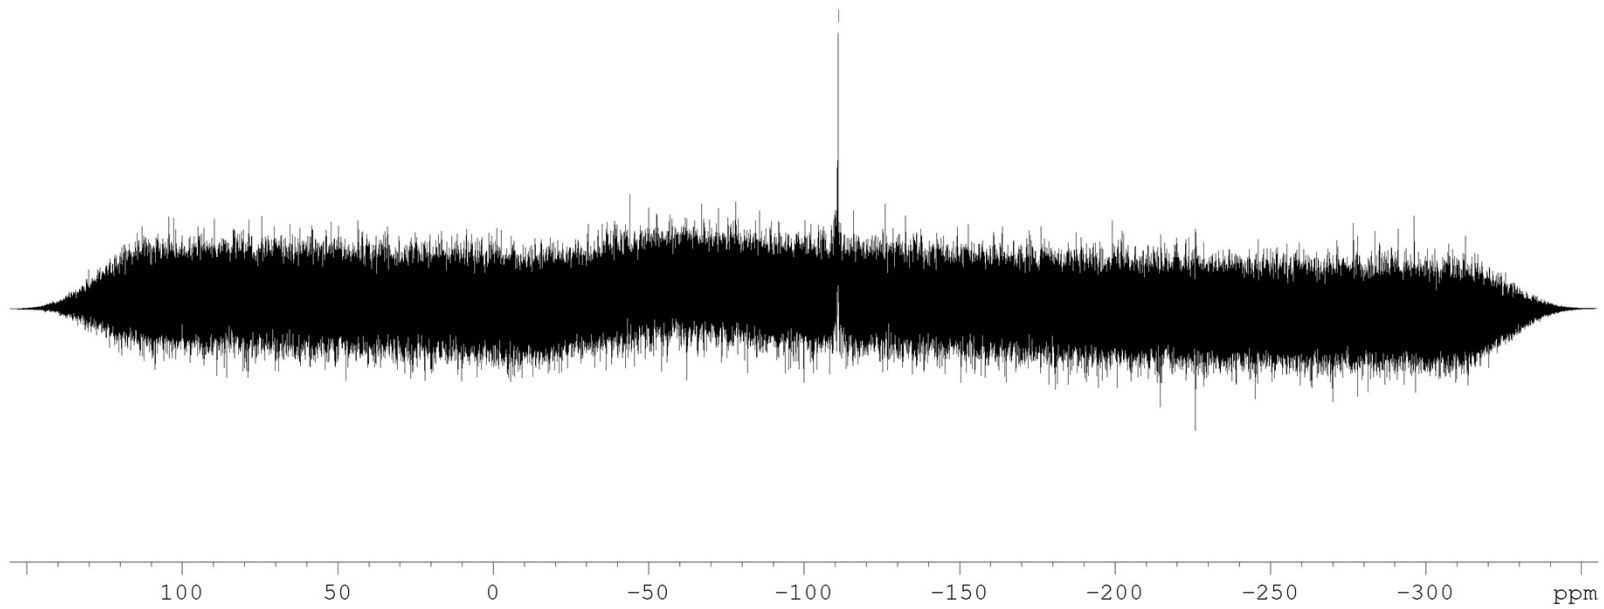

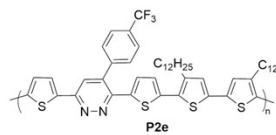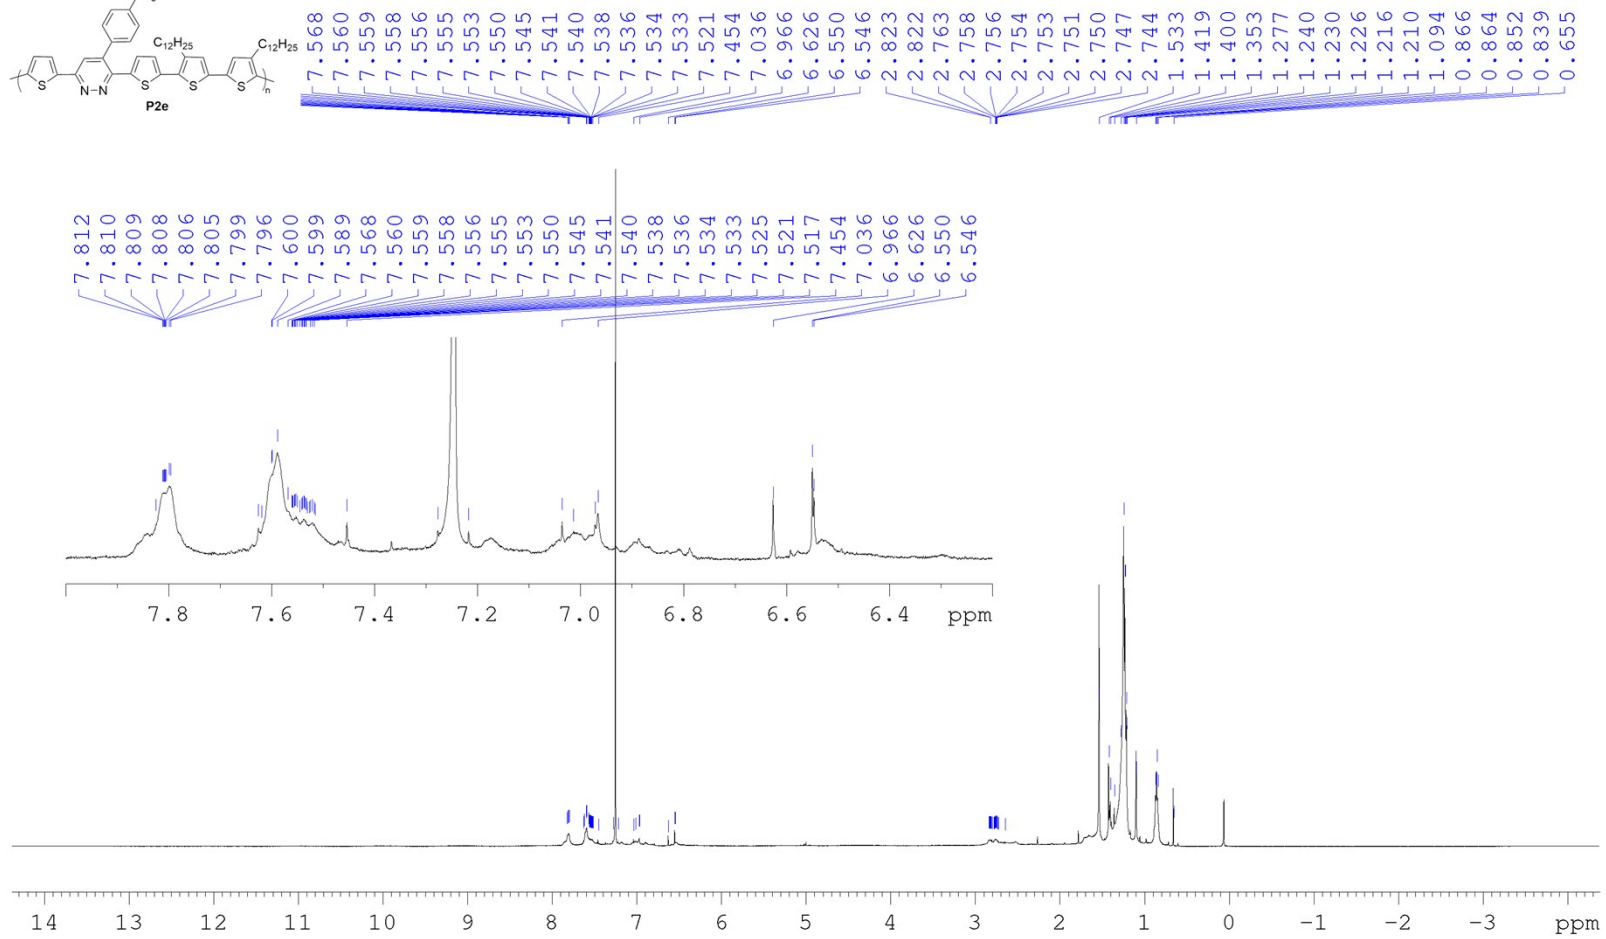

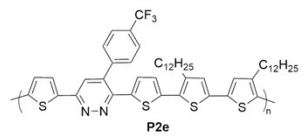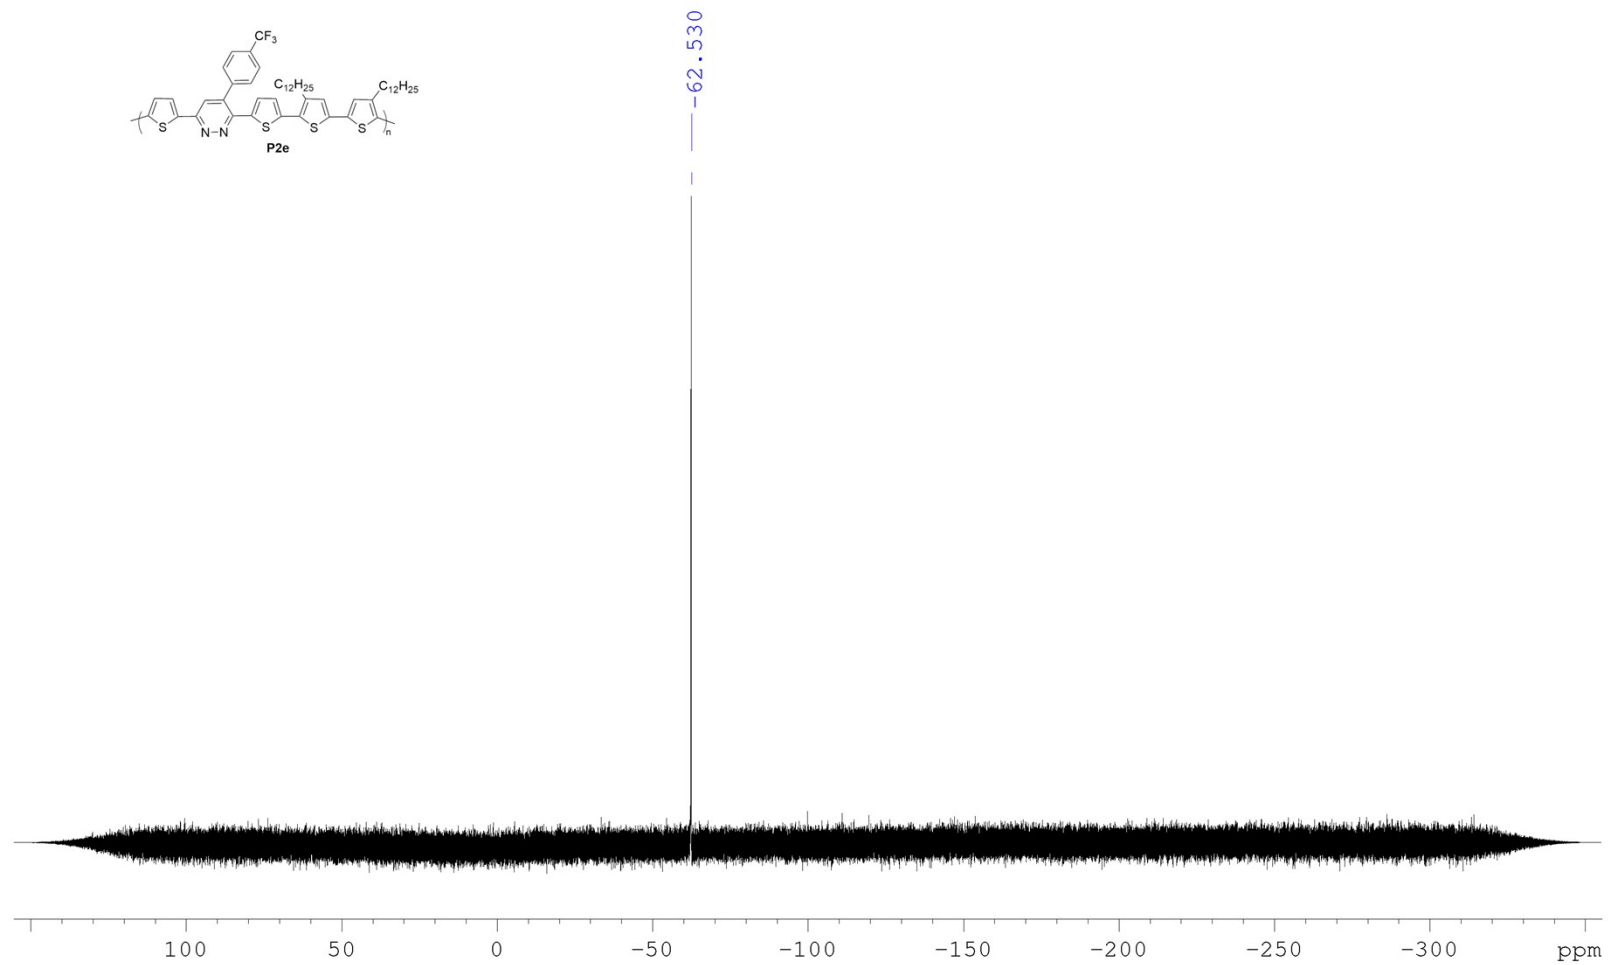

Supplement: d3py00585b1.pdf [file d3py00585b1.pdf]
